# Supplementary material for: Effects of Lysine N-ζ-Methylation in Ultrashort Tetrabasic Lipopeptides (UTBLPs) on the Potentiation of Rifampicin, Novobiocin, and Niclosamide in Gram-Negative Bacteria
Source: MDPI journal article supplement (doi:10.3390/antibiotics11030335), 2022-03-03
Supplement: s1 [file s1]

# Effects of lysine *N*- $\zeta$ -methylation in ultrashort tetrabasic lipopeptides (UTBLPs) on the potentiation of rifampicin, novobiocin, and niclosamide in Gram-negative bacteria

Linus Schweizer, Danyel Ramirez, Frank Schweizer

## Table of Contents:

|                                                                                                   |         |
|---------------------------------------------------------------------------------------------------|---------|
| 1. Antibacterial activity of UTBLPs <b>1-8</b> against MDR GNB and clinically relevant GPB .....  | S2      |
| 2. Synergy studies of UTBLPs <b>1-8</b> against GNB and GPB.....                                  | S3-S7   |
| 3. OM permeabilization of NPN by UTBLPs <b>1-8</b> against wild-type GNB .....                    | S8-S11  |
| 4. NMR spectra ( $^1\text{H}$ , $^{13}\text{C}$ , COSY, HSQC and HMBC) of UTBLPs <b>1-8</b> ..... | S12-S31 |
| 5. Resistance phenotype of MDR GNB.....                                                           | S32     |

**Table S1.** Antibacterial activity of UTBLPs **1-8** against MDR GNB and clinically relevant GPB.

| Organism                          | MIC (µg/mL) |      |      |      |      |      |      |      |
|-----------------------------------|-------------|------|------|------|------|------|------|------|
|                                   | 1           | 2    | 3    | 4    | 5    | 6    | 7    | 8    |
| <i>P. aeruginosa</i> PA259-96196  | >128        | >128 | >128 | >128 | 128  | >128 | >128 | >128 |
| <i>P. aeruginosa</i> PA262-101856 | 128         | >128 | >128 | >128 | >128 | >128 | >128 | >128 |
| <i>A. baumannii</i> AB027         | 128         | >128 | >128 | >128 | 128  | >128 | 128  | >128 |
| <i>A. baumannii</i> AB92247       | 64          | >128 | >128 | >128 | 32   | 32   | 32   | 128  |
| <i>E. coli</i> 94393              | >128        | >128 | >128 | >128 | 32   | 64   | 64   | 128  |
| <i>E. coli</i> 94474              | >128        | >128 | >128 | >128 | 128  | >128 | 128  | >128 |
| <i>E. cloacae</i> 118564          | >128        | >128 | >128 | >128 | >128 | >128 | >128 | >128 |
| <i>K. pneumoniae</i> 113250       | >128        | >128 | >128 | >128 | >128 | >128 | >128 | >128 |
| MRSE 61589                        | 32          | 64   | >128 | >128 | 8    | 16   | 32   | 128  |
| MSSE 81388                        | 32          | 64   | >128 | >128 | 16   | 16   | 32   | 128  |

**Table S2.** Synergy evaluation of UTBLPs 1-8 combined with RIF, NOV, NIC, or CHL against wild-type GNB.

| Organism                       | UTBLP | Antibiotic      | MIC <sub>UTBLP</sub> [MIC <sub>Combo</sub> ] (μg/mL) | MIC <sub>Antibiotic</sub> [MIC <sub>Combo</sub> ] (μg/mL) | FIC Index      | Interpretation |
|--------------------------------|-------|-----------------|------------------------------------------------------|-----------------------------------------------------------|----------------|----------------|
| <i>P. aeruginosa</i> PAO1      | 1     | Rifampicin      | >128 [4]                                             | 16 [2]                                                    | 0.125<x<0.156  | Synergy        |
|                                | 2     |                 | >128 [8]                                             | 16 [8]                                                    | 0.5<x<0.563    | Additive       |
|                                | 3     |                 | >128 [0.25]                                          | 16 [16]                                                   | 1<x<1.002      | Additive       |
|                                | 4     |                 | >128 [0.25]                                          | 16 [16]                                                   | 1<x<1.002      | Additive       |
|                                | 5     |                 | >128 [16]                                            | 8 [0.5]                                                   | 0.0625<x<0.188 | Synergy        |
|                                | 6     |                 | >128 [16]                                            | 16 [1]                                                    | 0.0625<x<0.188 | Synergy        |
|                                | 7     |                 | >128 [16]                                            | 8 [4]                                                     | 0.5<x<0.625    | Additive       |
|                                | 8     |                 | >128 [0.25]                                          | 16 [16]                                                   | 1<x<1.002      | Additive       |
|                                | 1     | Novobiocin      | >128 [16]                                            | 512 [32]                                                  | 0.063<x<0.188  | Synergy        |
|                                | 2     |                 | >128 [16]                                            | 1024 [256]                                                | 0.25<x<0.375   | Synergy        |
|                                | 3     |                 | >128 [16]                                            | 1024 [512]                                                | 0.5<x<0.675    | Additive       |
|                                | 4     |                 | >128 [16]                                            | 1024 [512]                                                | 0.5<x<0.675    | Additive       |
|                                | 5     |                 | >128 [16]                                            | 512 [8]                                                   | 0.016<x<0.141  | Synergy        |
|                                | 6     |                 | >128 [16]                                            | 512 [32]                                                  | 0.063<x<0.188  | Synergy        |
|                                | 7     |                 | >128 [16]                                            | 512 [128]                                                 | 0.25<x<0.375   | Synergy        |
|                                | 8     |                 | >128 [0.25]                                          | 512 [512]                                                 | 1<x<1.002      | Additive       |
|                                | 1     | Niclosamide     | >128 [0.25]                                          | 1024 [1024]                                               | 1<x<1.002      | Additive       |
|                                | 2     |                 | >128 [0.25]                                          | 1024 [1024]                                               | 1<x<1.002      | Additive       |
|                                | 3     |                 | >128 [0.25]                                          | 1024 [1024]                                               | 1<x<1.002      | Additive       |
|                                | 4     |                 | >128 [0.25]                                          | 1024 [1024]                                               | 1<x<1.002      | Additive       |
|                                | 5     |                 | >128 [4]                                             | 1024 [4]                                                  | 0.004<x<0.035  | Synergy        |
|                                | 6     |                 | >128 [16]                                            | 1024 [2]                                                  | 0.002<x<0.127  | Synergy        |
|                                | 7     |                 | >128 [0.25]                                          | 1024 [1024]                                               | 1<x<1.002      | Additive       |
|                                | 8     |                 | >128 [0.25]                                          | 1024 [1024]                                               | 1<x<1.002      | Additive       |
|                                | 1     | Chloramphenicol | >128 [2]                                             | 32 [4]                                                    | 0.125<x<0.141  | Synergy        |
|                                | 2     |                 | >128 [8]                                             | 32 [8]                                                    | 0.25<x<0.313   | Synergy        |
|                                | 3     |                 | >128 [8]                                             | 16 [8]                                                    | 0.5<x<0.563    | Additive       |
|                                | 4     |                 | >128 [16]                                            | 16 [16]                                                   | 1<x<1.002      | Additive       |
|                                | 5     |                 | >128 [2]                                             | 16 [2]                                                    | 0.125<x<0.141  | Synergy        |
|                                | 6     |                 | >128 [16]                                            | 16 [2]                                                    | 0.125<x<0.25   | Synergy        |
|                                | 7     |                 | >128 [8]                                             | 16 [8]                                                    | 0.5<x<0.563    | Additive       |
|                                | 8     |                 | >128 [0.25]                                          | 16 [16]                                                   | 1<x<1.002      | Additive       |
| <i>A. baumannii</i> ATCC 17978 | 1     | Rifampicin      | >128 [8]                                             | 2 [0.125]                                                 | 0.063<x<0.125  | Synergy        |
|                                | 2     |                 | >128 [16]                                            | 1 [0.031]                                                 | 0.031<x<0.156  | Synergy        |
|                                | 3     |                 | >128 [8]                                             | 2 [0.5]                                                   | 0.25<x<0.313   | Synergy        |
|                                | 4     |                 | >128 [16]                                            | 1 [0.5]                                                   | 0.5<x<0.625    | Additive       |
|                                | 5     |                 | 64 [1]                                               | 2 [0.031]                                                 | 0.031          | Synergy        |
|                                | 6     |                 | 64 [2]                                               | 2 [0.031]                                                 | 0.047          | Synergy        |
|                                | 7     |                 | 128 [4]                                              | 2 [0.125]                                                 | 0.094          | Synergy        |
|                                | 8     |                 | >128 [16]                                            | 2 [0.25]                                                  | 0.125<x<0.25   | Synergy        |
|                                | 1     | Novobiocin      | >128 [16]                                            | 32 [0.125]                                                | 0.004<x<0.129  | Synergy        |
|                                | 2     |                 | >128 [8]                                             | 32 [0.5]                                                  | 0.016<x<0.078  | Synergy        |
|                                | 3     |                 | >128 [8]                                             | 16 [1]                                                    | 0.063<x<0.125  | Synergy        |
|                                | 4     |                 | >128 [16]                                            | 32 [4]                                                    | 0.125<x<0.25   | Synergy        |
|                                | 5     |                 | 64 [2]                                               | 8 [0.125]                                                 | 0.047          | Synergy        |
|                                | 6     |                 | 64 [4]                                               | 8 [0.25]                                                  | 0.063          | Synergy        |
|                                | 7     |                 | 128 [4]                                              | 16 [0.5]                                                  | 0.063          | Synergy        |
|                                | 8     |                 | >128 [16]                                            | 16 [4]                                                    | 0.063<x<0.189  | Synergy        |
|                                | 1     | Niclosamide     | >128 [8]                                             | 512 [0.5]                                                 | 0.001<x<0.126  | Synergy        |
|                                | 2     |                 | >128 [8]                                             | 1024 [2]                                                  | 0.002<x<0.064  | Synergy        |
|                                | 3     |                 | >128 [0.25]                                          | 1024 [1024]                                               | 1<x<1.002      | Additive       |
|                                | 4     |                 | >128 [0.25]                                          | 1024 [1024]                                               | 1<x<1.002      | Additive       |
|                                | 5     |                 | 64 [0.5]                                             | >1024 [1]                                                 | x<0.009        | Synergy        |
|                                | 6     |                 | 64 [1]                                               | >1024 [4]                                                 | x<0.020        | Synergy        |
|                                | 7     |                 | 128 [4]                                              | >1024 [4]                                                 | x<0.035        | Synergy        |
|                                | 8     |                 | >128 [2]                                             | >1024 [16]                                                | x<0.031        | Synergy        |
|                                | 1     | Chloramphenicol | >128 [32]                                            | 64 [32]                                                   | 0.5<x<0.75     | Additive       |
|                                | 2     |                 | >128 [0.25]                                          | 128 [64]                                                  | 0.5<x<0.502    | Additive       |
|                                | 3     |                 | >128 [16]                                            | 128 [64]                                                  | 0.5<x<0.625    | Additive       |
|                                | 4     |                 | >128 [0.25]                                          | 128 [128]                                                 | 1<x<1.002      | Additive       |
|                                | 5     |                 | 64 [4]                                               | 64 [32]                                                   | 0.563          | Additive       |
|                                | 6     |                 | 64 [8]                                               | 64 [32]                                                   | 0.625          | Additive       |
|                                | 7     |                 | 128 [0.25]                                           | 64 [64]                                                   | 1.002          | Additive       |
|                                | 8     |                 | >128 [0.25]                                          | 64 [64]                                                   | 1<x<1.002      | Additive       |
| <i>E. coli</i> ATCC 25922      | 1     | Rifampicin      | >128 [8]                                             | 4 [0.125]                                                 | 0.031<x<0.094  | Synergy        |
|                                | 2     |                 | >128 [16]                                            | 4 [0.125]                                                 | 0.031<x<0.156  | Synergy        |
|                                | 3     |                 | >128 [16]                                            | 4 [1]                                                     | 0.25<x<0.375   | Synergy        |
|                                | 4     |                 | >128 [8]                                             | 4 [2]                                                     | 0.5<x<0.563    | Additive       |
|                                | 5     |                 | 64 [2]                                               | 2 [0.063]                                                 | 0.063          | Synergy        |
|                                | 6     |                 | 32 [4]                                               | 2 [0.063]                                                 | 0.156          | Synergy        |
|                                | 7     |                 | 64 [8]                                               | 2 [0.125]                                                 | 0.188          | Synergy        |
|                                | 8     |                 | >128 [16]                                            | 2 [1]                                                     | 0.5<x<0.625    | Additive       |
|                                | 1     | Novobiocin      | >128 [8]                                             | 32 [0.25]                                                 | 0.008<x<0.070  | Synergy        |
|                                | 2     |                 | >128 [8]                                             | 64 [1]                                                    | 0.016<x<0.078  | Synergy        |
|                                | 3     |                 | >128 [16]                                            | 64 [4]                                                    | 0.063<x<0.188  | Synergy        |
|                                | 4     |                 | >128 [16]                                            | 64 [16]                                                   | 0.25<x<0.375   | Synergy        |

|  |   |                 |             |            |               |          |
|--|---|-----------------|-------------|------------|---------------|----------|
|  | 5 |                 | 64 [1]      | 32 [0.5]   | 0.031         | Synergy  |
|  | 6 |                 | 32 [2]      | 32 [0.5]   | 0.078         | Synergy  |
|  | 7 |                 | 64 [2]      | 32 [2]     | 0.094         | Synergy  |
|  | 8 |                 | >128 [16]   | 32 [2]     | 0.063<x<0.188 | Synergy  |
|  | 1 | Niclosamide     | >128 [8]    | >128 [0.5] | x<0.133       | Synergy  |
|  | 2 |                 | >128 [4]    | >128 [2]   | x<0.133       | Synergy  |
|  | 3 |                 | >128 [16]   | >128 [8]   | x<0.188       | Synergy  |
|  | 4 |                 | >128 [ND]   | >128 [ND]  | ND            | ND       |
|  | 5 |                 | 64 [0.5]    | >256 [2]   | 0.008<x<0.016 | Synergy  |
|  | 6 |                 | 32 [1]      | >256 [2]   | 0.031<x<0.039 | Synergy  |
|  | 7 |                 | 64 [4]      | >256 [1]   | 0.063<x<0.066 | Synergy  |
|  | 8 |                 | >128 [8]    | >256 [8]   | x<0.094       | Synergy  |
|  | 1 | Chloramphenicol | >128 [32]   | 4 [1]      | 0.25<x<0.5    | Synergy  |
|  | 2 |                 | >128 [0.25] | 2 [2]      | 1<x<1.002     | Additive |
|  | 3 |                 | >128 [0.5]  | 2 [2]      | 1<x<1.004     | Additive |
|  | 4 |                 | >128 [1]    | 2 [2]      | 1<x<1.008     | Additive |
|  | 5 |                 | 64 [16]     | 8 [0.25]   | 0.281         | Synergy  |
|  | 6 |                 | 32 [8]      | 8 [2]      | 0.5           | Synergy  |
|  | 7 |                 | 64 [16]     | 4 [0.5]    | 0.375         | Synergy  |
|  | 8 |                 | >128 [8]    | 8 [2]      | 0.313         | Synergy  |



**Table S3.** Synergy evaluation of UTBLPs 1-8 combined with RIF or NOV against MDR GNB.

| Organism                          | UTBLP | Antibiotic | MIC <sub>UTBLP</sub> [MIC <sub>combo</sub> ] (µg/mL) | MIC <sub>antibiotic</sub> [MIC <sub>combo</sub> ] (µg/mL) | FIC Index     | Interpretation |
|-----------------------------------|-------|------------|------------------------------------------------------|-----------------------------------------------------------|---------------|----------------|
| <i>P. aeruginosa</i> PA259-96196  | 1     | Rifampicin | >128 [16]                                            | 16 [0.5]                                                  | 0.031<x<0.156 | Synergy        |
|                                   | 2     |            | >128 [16]                                            | 16 [4]                                                    | 0.25<x<0.375  | Synergy        |
|                                   | 3     |            | >128 [16]                                            | 16 [16]                                                   | 1<x<1.002     | Additive       |
|                                   | 4     |            | >128 [0.25]                                          | 16 [16]                                                   | 1<x<1.002     | Additive       |
|                                   | 5     |            | >128 [8]                                             | 16 [0.5]                                                  | 0.0938        | Synergy        |
|                                   | 6     |            | >128 [16]                                            | 16 [2]                                                    | 0.125<x<0.25  | Synergy        |
|                                   | 7     |            | >128 [16]                                            | 16 [8]                                                    | 0.5<x<0.625   | Additive       |
|                                   | 8     |            | >128 [16]                                            | 16 [16]                                                   | 1<x<1.002     | Additive       |
|                                   | 1     | Novobiocin | >128 [8]                                             | 2048 [128]                                                | 0.063<x<0.125 | Synergy        |
|                                   | 2     |            | >128 [16]                                            | 2048 [512]                                                | 0.25<x<0.375  | Synergy        |
|                                   | 3     |            | >128 [0.25]                                          | 2048 [2048]                                               | 1<x<1.002     | Additive       |
|                                   | 4     |            | >128 [0.25]                                          | 2048 [2048]                                               | 1<x<1.002     | Additive       |
|                                   | 5     |            | 128 [4]                                              | 1024 [16]                                                 | 0.094         | Synergy        |
|                                   | 6     |            | >128 [16]                                            | 1024 [128]                                                | 0.125<x<0.25  | Synergy        |
|                                   | 7     |            | >128 [16]                                            | 1024 [512]                                                | 0.5<x<0.625   | Additive       |
|                                   | 8     |            | >128 [16]                                            | 1024 [1024]                                               | 1<x<1.002     | Additive       |
| <i>P. aeruginosa</i> PA262-101856 | 1     | Rifampicin | 128 [16]                                             | 1024 [256]                                                | 0.375         | Synergy        |
|                                   | 2     |            | >128 [0.25]                                          | 512 [512]                                                 | 1<x<1.002     | Additive       |
|                                   | 3     |            | >128 [0.25]                                          | 512 [512]                                                 | 1<x<1.002     | Additive       |
|                                   | 4     |            | >128 [0.25]                                          | 512 [512]                                                 | 1<x<1.002     | Additive       |
|                                   | 5     |            | >128 [16]                                            | 512 [32]                                                  | 0.063<x<0.125 | Synergy        |
|                                   | 6     |            | >128 [16]                                            | 512 [256]                                                 | 0.5<x<0.625   | Additive       |
|                                   | 7     |            | >128 [16]                                            | 512 [512]                                                 | 1<x<1.002     | Additive       |
|                                   | 8     |            | >128 [16]                                            | 512 [512]                                                 | 1<x<1.002     | Additive       |
|                                   | 1     | Novobiocin | 128 [16]                                             | >1024 [64]                                                | 0.125<x<0.188 | Synergy        |
|                                   | 2     |            | >128 [16]                                            | 1024 [512]                                                | 0.5<x<0.625   | Additive       |
|                                   | 3     |            | >128 [8]                                             | 2048 [1024]                                               | 0.5<x<0.563   | Additive       |
|                                   | 4     |            | >128 [16]                                            | 1024 [1024]                                               | 1<x<1.125     | Additive       |
|                                   | 5     |            | >128 [16]                                            | 1024 [16]                                                 | 0.016<x<0.141 | Synergy        |
|                                   | 6     |            | >128 [16]                                            | 1024 [128]                                                | 0.125<x<0.5   | Synergy        |
|                                   | 7     |            | >128 [16]                                            | 1024 [512]                                                | 0.5<x<0.625   | Additive       |
|                                   | 8     |            | >128 [16]                                            | 1024 [1024]                                               | 1<x<1.002     | Additive       |
| <i>A. baumannii</i> AB027         | 1     | Rifampicin | 128 [8]                                              | 1 [0.063]                                                 | 0.125         | Synergy        |
|                                   | 2     |            | >128 [16]                                            | 1 [0.063]                                                 | 0.063<x<0.188 | Synergy        |
|                                   | 3     |            | >128 [4]                                             | 1 [0.5]                                                   | 0.5<x<0.531   | Additive       |
|                                   | 4     |            | >128 [0.25]                                          | 1 [1]                                                     | 1<x<1.002     | Additive       |
|                                   | 5     |            | 128 [2]                                              | 1 [0.016]                                                 | 0.031         | Synergy        |
|                                   | 6     |            | >128 [16]                                            | 1 [0.002]                                                 | 0.002<x<0.127 | Synergy        |
|                                   | 7     |            | 128 [8]                                              | 1 [0.063]                                                 | 0.125         | Synergy        |
|                                   | 8     |            | >128 [16]                                            | 1 [0.25]                                                  | 0.25<x<0.375  | Synergy        |
|                                   | 1     | Novobiocin | 128 [8]                                              | 8 [0.125]                                                 | 0.078         | Synergy        |
|                                   | 2     |            | >128 [16]                                            | 16 [0.25]                                                 | 0.125<x<0.141 | Synergy        |
|                                   | 3     |            | >128 [16]                                            | 16 [2]                                                    | 0.125<x<0.25  | Synergy        |
|                                   | 4     |            | >128 [16]                                            | 16 [4]                                                    | 0.25<x<0.375  | Synergy        |
|                                   | 5     |            | 128 [1]                                              | 16 [0.25]                                                 | 0.023         | Synergy        |
|                                   | 6     |            | >128 [16]                                            | 16 [0.031]                                                | 0.002<x<0.127 | Synergy        |
|                                   | 7     |            | 128 [4]                                              | 16 [0.5]                                                  | 0.063         | Synergy        |
|                                   | 8     |            | >128 [16]                                            | 16 [2]                                                    | 0.125<x<0.25  | Synergy        |
| <i>A. baumannii</i> 92247         | 1     | Rifampicin | 64 [4]                                               | 1 [0.125]                                                 | 0.188         | Synergy        |
|                                   | 2     |            | >128 [16]                                            | 2 [0.063]                                                 | 0.031<x<0.156 | Synergy        |
|                                   | 3     |            | >128 [16]                                            | 1 [0.25]                                                  | 0.25<x<0.375  | Synergy        |
|                                   | 4     |            | >128 [0.25]                                          | 1 [1]                                                     | 1<x<1.002     | Additive       |
|                                   | 5     |            | 32 [2]                                               | 1 [0.063]                                                 | 0.125         | Synergy        |
|                                   | 6     |            | 32 [0.5]                                             | 1 [0.063]                                                 | 0.078         | Synergy        |
|                                   | 7     |            | 32 [8]                                               | 1 [0.125]                                                 | 0.375         | Synergy        |
|                                   | 8     |            | 128 [16]                                             | 1 [0.5]                                                   | 0.063         | Synergy        |
|                                   | 1     | Novobiocin | 64 [4]                                               | 2 [0.25]                                                  | 0.188         | Synergy        |
|                                   | 2     |            | >128 [16]                                            | 4 [0.25]                                                  | 0.063<x<0.188 | Synergy        |
|                                   | 3     |            | >128 [8]                                             | 4 [1]                                                     | 0.25<x<0.313  | Synergy        |
|                                   | 4     |            | >128 [1]                                             | 4 [4]                                                     | 1<x<1.008     | Additive       |
|                                   | 5     |            | 32 [1]                                               | 4 [0.125]                                                 | 0.063         | Synergy        |
|                                   | 6     |            | 32 [1]                                               | 2 [0.125]                                                 | 0.094         | Synergy        |
|                                   | 7     |            | 32 [1]                                               | 2 [0.25]                                                  | 0.156         | Synergy        |
|                                   | 8     |            | 128 [16]                                             | 2 [0.125]                                                 | 0.188         | Synergy        |
| <i>E. coli</i> 94393              | 1     | Rifampicin | >128 [8]                                             | 4 [0.031]                                                 | 0.004<x<0.066 | Synergy        |
|                                   | 2     |            | >128 [16]                                            | 4 [0.125]                                                 | 0.031<x<0.156 | Synergy        |
|                                   | 3     |            | >128 [16]                                            | 4 [1]                                                     | 0.25<x<0.375  | Synergy        |
|                                   | 4     |            | >128 [0.25]                                          | 4 [4]                                                     | 1<x<1.002     | Additive       |
|                                   | 5     |            | 32 [4]                                               | 4 [0.125]                                                 | 0.156         | Synergy        |
|                                   | 6     |            | 64 [4]                                               | 4 [0.25]                                                  | 0.125         | Synergy        |
|                                   | 7     |            | 64 [8]                                               | 4 [0.5]                                                   | 0.25          | Synergy        |
|                                   | 8     |            | 128 [16]                                             | 4 [20]                                                    | 0.625         | Additive       |
|                                   | 1     | Novobiocin | >128 [8]                                             | 128 [0.5]                                                 | 0.004<x<0.066 | Synergy        |
|                                   | 2     |            | >128 [16]                                            | 64 [1]                                                    | 0.016<x<0.141 | Synergy        |
|                                   | 3     |            | >128 [16]                                            | 64 [8]                                                    | 0.125<x<0.25  | Synergy        |
|                                   | 4     |            | >128 [0.25]                                          | 64 [32]                                                   | 0.5<x<0.502   | Additive       |
|                                   | 5     |            | 32 [1]                                               | 64 [2]                                                    | 0.063         | Synergy        |
|                                   | 6     |            | 64 [4]                                               | 64 [1]                                                    | 0.078         | Synergy        |

|                             |   |            |             |           |               |          |
|-----------------------------|---|------------|-------------|-----------|---------------|----------|
|                             | 7 |            | 64 [4]      | 64 [2]    | 0.093         | Synergy  |
|                             | 8 |            | 128 [16]    | 64 [16]   | 0.375         | Synergy  |
| <i>E. coli</i> 94474        | 1 | Rifampicin | >128 [8]    | 4 [0.125] | 0.031<x<0.094 | Synergy  |
|                             | 2 |            | >128 [16]   | 8 [0.5]   | 0.063<x<0.188 | Synergy  |
|                             | 3 |            | >128 [16]   | 4 [2]     | 0.5<x<0.625   | Additive |
|                             | 4 |            | >128 [16]   | 4 [4]     | 1<x<1.002     | Additive |
|                             | 5 |            | 128 [2]     | 8 [0.25]  | 0.047         | Synergy  |
|                             | 6 |            | >128 [16]   | 4 [0.125] | 0.031<x<0.156 | Synergy  |
|                             | 7 |            | 128 [16]    | 4 [1]     | 0.375         | Synergy  |
|                             | 8 |            | >128 [16]   | 8 [4]     | 0.5<x<0.625   | Additive |
|                             | 1 | Novobiocin | >128 [8]    | 256 [4]   | 0.016<x<0.078 | Synergy  |
|                             | 2 |            | >128 [16]   | 256 [4]   | 0.016<x<0.141 | Synergy  |
|                             | 3 |            | >128 [16]   | 256 [32]  | 0.125<x<0.25  | Synergy  |
|                             | 4 |            | >128 [16]   | 256 [128] | 0.5<x<0.625   | Additive |
|                             | 5 |            | 128 [4]     | 128 [1]   | 0.039         | Synergy  |
|                             | 6 |            | >128 [16]   | 128 [1]   | 0.008<x<0.133 | Synergy  |
|                             | 7 |            | 128 [8]     | 256 [16]  | 0.125         | Synergy  |
|                             | 8 |            | >128 [8]    | 256 [64]  | 0.25<x<0.313  | Synergy  |
| <i>E. cloacae</i> 118564    | 1 | Rifampicin | >128 [8]    | 8 [0.125] | 0.016<x<0.078 | Synergy  |
|                             | 2 |            | >128 [16]   | 8 [0.2]   | 0.031<x<0.156 | Synergy  |
|                             | 3 |            | >128 [8]    | 8 [2]     | 0.25<x<0.313  | Synergy  |
|                             | 4 |            | >128 [16]   | 8 [4]     | 0.5<x<0.625   | Additive |
|                             | 5 |            | >128 [8]    | 8 [0.5]   | 0.063<x<0.125 | Synergy  |
|                             | 6 |            | >128 [16]   | 8 [0.5]   | 0.063<x<0.188 | Synergy  |
|                             | 7 |            | >128 [16]   | 8 [1]     | 0.125<x<0.25  | Synergy  |
|                             | 8 |            | >128 [16]   | 8 [4]     | 0.5<x<0.563   | Additive |
|                             | 1 | Novobiocin | >128 [8]    | 256 [2]   | 0.008<x<0.070 | Synergy  |
|                             | 2 |            | >128 [16]   | 256 [8]   | 0.031<x<0.094 | Synergy  |
|                             | 3 |            | >128 [16]   | 256 [16]  | 0.063<x<0.188 | Synergy  |
|                             | 4 |            | >128 [16]   | 256 [128] | 0.5<x<0.563   | Additive |
|                             | 5 |            | >128 [16]   | 256 [0.5] | 0.002<x<0.127 | Synergy  |
|                             | 6 |            | >128 [16]   | 256 [1]   | 0.004<x<0.129 | Synergy  |
|                             | 7 |            | >128 [16]   | 256 [4]   | 0.016<x<0.141 | Synergy  |
|                             | 8 |            | >128 [16]   | 256 [32]  | 0.125<x<0.25  | Synergy  |
| <i>K. pneumoniae</i> 113250 | 1 | Rifampicin | >128 [16]   | 16 [0.5]  | 0.031<x<0.156 | Synergy  |
|                             | 2 |            | >128 [16]   | 16 [4]    | 0.125<x<0.188 | Synergy  |
|                             | 3 |            | >128 [16]   | 16 [4]    | 0.25<0.313    | Synergy  |
|                             | 4 |            | >128 [0.25] | 8 [8]     | 1<x<1.002     | Additive |
|                             | 5 |            | >128 [8]    | 8 [0.5]   | 0.063<x<0.125 | Synergy  |
|                             | 6 |            | >128 [16]   | 8 [1]     | 0.125<x<0.25  | Synergy  |
|                             | 7 |            | >128 [16]   | 8 [2]     | 0.25<x<0.375  | Synergy  |
|                             | 8 |            | >128 [16]   | 16 [4]    | 0.25<x<0.375  | Synergy  |
|                             | 1 | Novobiocin | >128 [8]    | 256 [16]  | 0.063<x<0.094 | Synergy  |
|                             | 2 |            | >128 [16]   | 256 [4]   | 0.016<x<0.141 | Synergy  |
|                             | 3 |            | >128 [16]   | 256 [32]  | 0.125<x<0.25  | Synergy  |
|                             | 4 |            | >128 [16]   | 256 [128] | 0.5<x<0.625   | Additive |
|                             | 5 |            | >128 [16]   | 64 [1]    | 0.016<x<0.141 | Synergy  |
|                             | 6 |            | >128 [16]   | 64 [2]    | 0.031<x<0.156 | Synergy  |
|                             | 7 |            | >128 [8]    | 128 [8]   | 0.063<x<0.125 | Synergy  |
|                             | 8 |            | >128 [16]   | 128 [32]  | 0.25<x<0.375  | Synergy  |

**Table S4.** Synergy evaluation of UTBLPs 1-8 combined with CHL against GPB.

| Organism                      | UTBLP | MIC <sub>UTBLP</sub> [MIC <sub>Combo</sub> ] (µg/mL) | MIC <sub>Chloramphenicol</sub> [MIC <sub>Combo</sub> ] (µg/mL) | FIC Index | Interpretation |
|-------------------------------|-------|------------------------------------------------------|----------------------------------------------------------------|-----------|----------------|
| <i>S. aureus</i> ATCC 29213   | 1     | 64 [0.25]                                            | 8 [8]                                                          | 1.004     | Additive       |
|                               | 2     | 128 [0.25]                                           | 16 [16]                                                        | 1.002     | Additive       |
|                               | 3     | >128 [0.25]                                          | 16 [16]                                                        | 1<x<1.002 | Additive       |
|                               | 4     | >128 [0.25]                                          | 16 [16]                                                        | 1<x<1.002 | Additive       |
|                               | 5     | 64 [16]                                              | 8 [2]                                                          | 0.5       | Additive       |
|                               | 6     | 128 [16]                                             | 8 [4]                                                          | 0.625     | Additive       |
|                               | 7     | >128 [0.25]                                          | 8 [8]                                                          | 1<x<1.002 | Additive       |
|                               | 8     | >128 [0.25]                                          | 8 [8]                                                          | 1<x<1.002 | Additive       |
| MRSA ATCC 33592               | 1     | 128 [0.25]                                           | 64 [64]                                                        | 1.002     | Additive       |
|                               | 2     | >128 [0.25]                                          | 64 [64]                                                        | 1<x<1.002 | Additive       |
|                               | 3     | >128 [0.25]                                          | 64 [64]                                                        | 1<x<1.002 | Additive       |
|                               | 4     | >128 [0.25]                                          | 64 [64]                                                        | 1<x<1.002 | Additive       |
|                               | 5     | 64 [0.25]                                            | 64 [64]                                                        | 1<x<1.004 | Additive       |
|                               | 6     | >128 [0.25]                                          | 64 [64]                                                        | 1<x<1.002 | Additive       |
|                               | 7     | >128 [0.25]                                          | 64 [64]                                                        | 1<x<1.002 | Additive       |
|                               | 8     | >128 [0.25]                                          | 64 [64]                                                        | 1<x<1.002 | Additive       |
| MRSE 61589                    | 1     | 32 [16]                                              | 8 [2]                                                          | 0.75      | Additive       |
|                               | 2     | 64 [0.25]                                            | 16 [16]                                                        | 1.004     | Additive       |
|                               | 3     | >128 [0.25]                                          | 16 [16]                                                        | 1<x<1.002 | Additive       |
|                               | 4     | >128 [0.25]                                          | 16 [16]                                                        | 1<x<1.002 | Additive       |
|                               | 5     | 8 [4]                                                | 8 [4]                                                          | 1         | Additive       |
|                               | 6     | 16 [8]                                               | 8 [4]                                                          | 1         | Additive       |
|                               | 7     | 32 [0.25]                                            | 8 [8]                                                          | 1.008     | Additive       |
|                               | 8     | 128 [0.25]                                           | 8 [8]                                                          | 1.002     | Additive       |
| MSSE 81388                    | 1     | 32 [0.25]                                            | 4 [4]                                                          | 1.008     | Additive       |
|                               | 2     | 64 [0.25]                                            | 8 [8]                                                          | 1.004     | Additive       |
|                               | 3     | >128 [0.25]                                          | 8 [8]                                                          | 1<x<1.002 | Additive       |
|                               | 4     | >128 [0.25]                                          | 8 [8]                                                          | 1<x<1.002 | Additive       |
|                               | 5     | 16 [8]                                               | 4 [0.25]                                                       | 1.063     | Additive       |
|                               | 6     | 16 [0.25]                                            | 4 [4]                                                          | 1.016     | Additive       |
|                               | 7     | 32 [0.25]                                            | 4 [4]                                                          | 1.008     | Additive       |
|                               | 8     | 128 [0.25]                                           | 4 [4]                                                          | 1.002     | Additive       |
| <i>E. faecalis</i> ATCC 29212 | 1     | 128 [16]                                             | 4 [2]                                                          | 0.625     | Additive       |
|                               | 2     | >128 [0.25]                                          | 8 [8]                                                          | 1<x<1.002 | Additive       |
|                               | 3     | >128 [0.25]                                          | 8 [8]                                                          | 1<x<1.002 | Additive       |
|                               | 4     | >128 [0.25]                                          | 8 [8]                                                          | 1<x<1.002 | Additive       |
|                               | 5     | 32 [4]                                               | 8 [4]                                                          | 0.625     | Additive       |
|                               | 6     | 32 [4]                                               | 8 [4]                                                          | 0.625     | Additive       |
|                               | 7     | 64 [8]                                               | 8 [4]                                                          | 0.625     | Additive       |
|                               | 8     | 128 [16]                                             | 8 [4]                                                          | 0.625     | Additive       |
| <i>E. faecium</i> ATCC 27270  | 1     | 64 [0.25]                                            | 8 [8]                                                          | 1.004     | Additive       |
|                               | 2     | >128 [0.25]                                          | 8 [8]                                                          | 1<x<1.002 | Additive       |
|                               | 3     | >128 [0.25]                                          | 8 [8]                                                          | 1<x<1.002 | Additive       |
|                               | 4     | >128 [0.25]                                          | 8 [8]                                                          | 1<x<1.002 | Additive       |
|                               | 5     | 32 [8]                                               | 4 [2]                                                          | 0.75      | Additive       |
|                               | 6     | 64 [4]                                               | 4 [4]                                                          | 1.004     | Additive       |
|                               | 7     | 128 [0.25]                                           | 4 [4]                                                          | 1.002     | Additive       |
|                               | 8     | >128 [0.25]                                          | 4 [4]                                                          | 1<x<1.002 | Additive       |

**Figure S1.** Dose-dependent increase in fluorescence of NPN in the presence of (A) UTBLP 1, (B) UTBLP 2, (C) UTBLP 3, (D) UTBLP 4, and PMBN (control) in *E. coli* ATCC 25922.

**A**

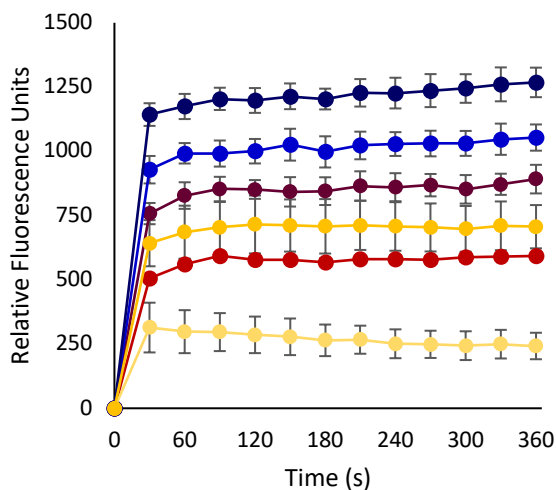

—●— 3.5 uM UTBLP 1 —●— 7 uM UTBLP 1  
—●— 14 uM UTBLP 1 —●— 28 uM UTBLP 1  
—●— 7 uM PMBN —●— 14 uM PMBN

**B**

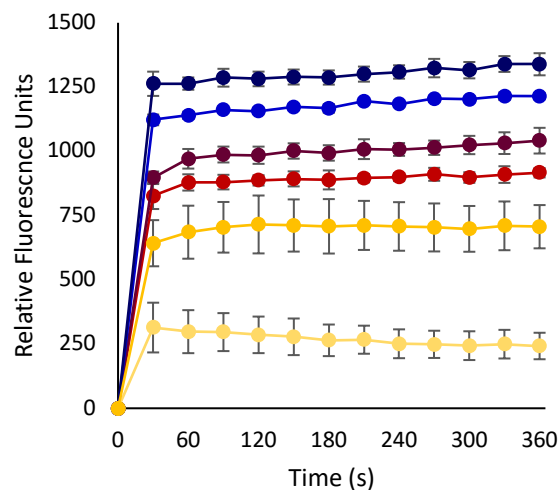

—●— 3.5 uM UTBLP 2 —●— 7 uM UTBLP 2  
—●— 14 uM UTBLP 2 —●— 28 uM UTBLP 2  
—●— 7 uM PMBN —●— 14 uM PMBN

**C**

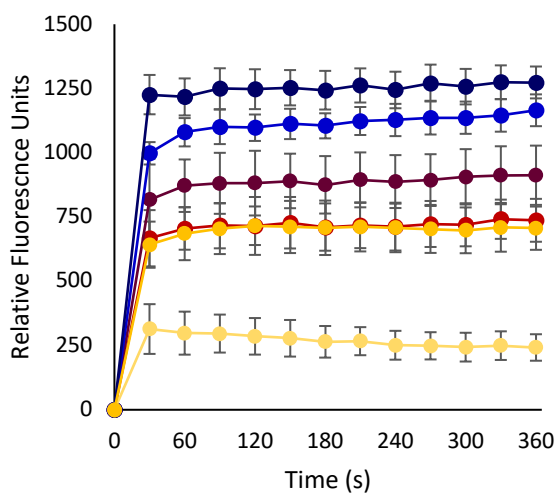

—●— 3.5 uM UTBLP 3 —●— 7 uM UTBLP 3  
—●— 14 uM UTBLP 3 —●— 28 uM UTBLP 3  
—●— 7 uM PMBN —●— 14 uM PMBN

**D**

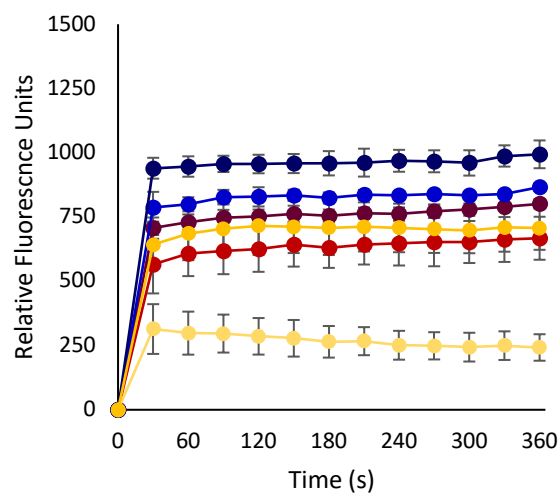

—●— 3.5 uM UTBLP 4 —●— 7 uM UTBLP 4  
—●— 14 uM UTBLP 4 —●— 28 uM UTBLP 4  
—●— 7 uM PMBN —●— 14 uM PMBN

**Figure S2.** Dose-dependent increase in fluorescence of NPN in the presence of (A) UTBLP 5, (B) UTBLP 6, (C) UTBLP 7, (D) UTBLP 8, and PMBN (control) in *A. baumannii* ATCC 17978.

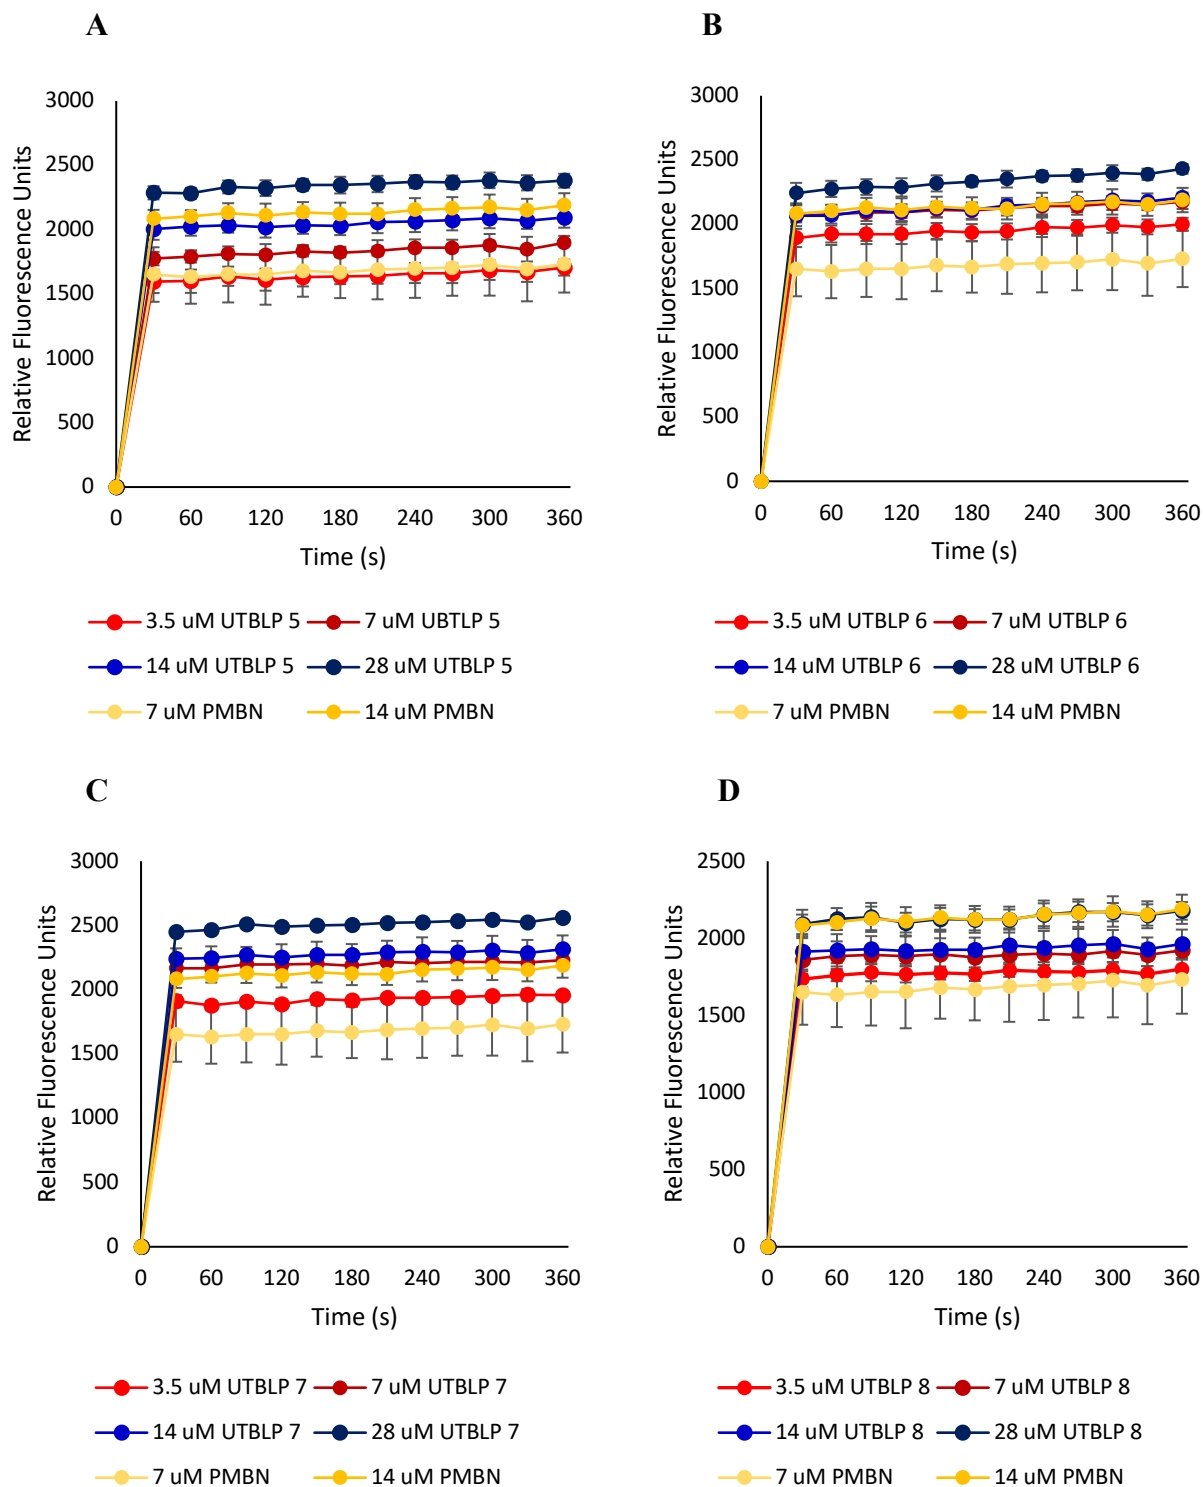

**Figure S3.** Dose-dependent increase in fluorescence of NPN in the presence of (A) UTBLP 5, (B) UTBLP 6, (C) UTBLP 7, (D) UTBLP 8, and PMBN (control) in *E. coli* ATCC 25922.

**A**

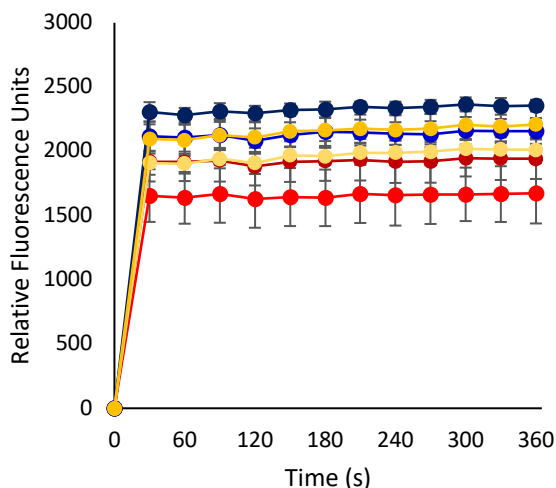

—●— 3.5 uM UTBLP 5 —■— 7 uM UTBLP 5  
—●— 14 uM UTBLP 5 —■— 28 uM UTBLP 5  
—●— 7 uM PMBN —■— 14 uM PMBN

**B**

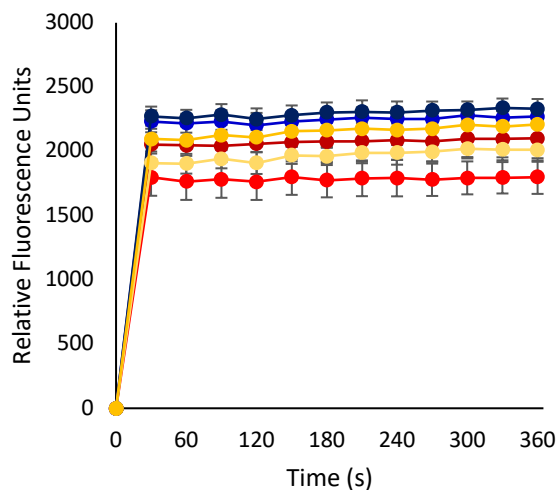

—●— 3.5 uM UTBLP 6 —■— 7 uM UTBLP 6  
—●— 14 uM UTBLP 6 —■— 28 uM UTBLP 6  
—●— 7 uM PMBN —■— 14 uM PMBN

**C**

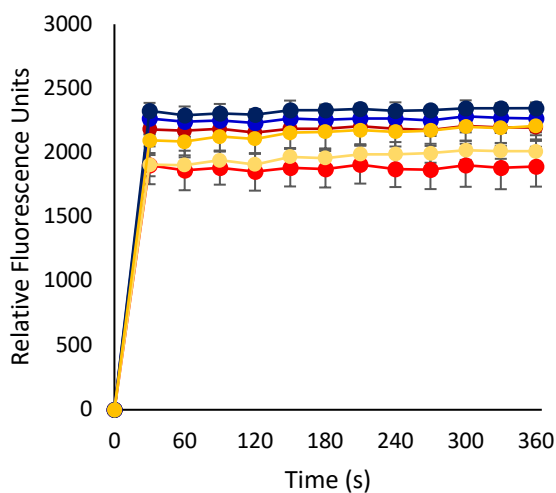

—●— 3.5 uM UTBLP 7 —■— 7 uM UTBLP 7  
—●— 14 uM UTBLP 7 —■— 28 uM UTBLP 7  
—●— 7 uM PMBN —■— 14 uM PMBN

**D**

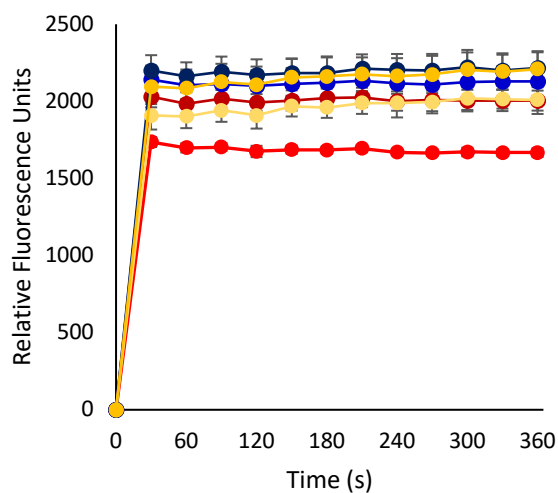

—●— 3.5 uM UTBLP 8 —■— 7 uM UTBLP 8  
—●— 14 uM UTBLP 8 —■— 28 uM UTBLP 8  
—●— 7 uM PMBN —■— 14 uM PMBN

**Figure S4.** Comparison of UTBLP-induced fluorescence of NPN at 7  $\mu$ M of (A) UTBLPs 1-4 and (B) UTBLPs 5-8 in *A. baumannii* ATCC 17978, and 7  $\mu$ M of (C) UTBLPs 1-4 and (D) UTBLPs 5-8 in *E. coli* ATCC 25922.

A

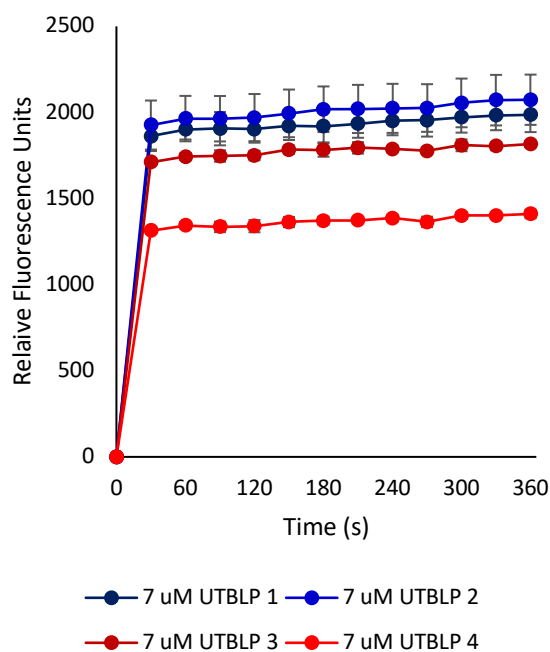

B

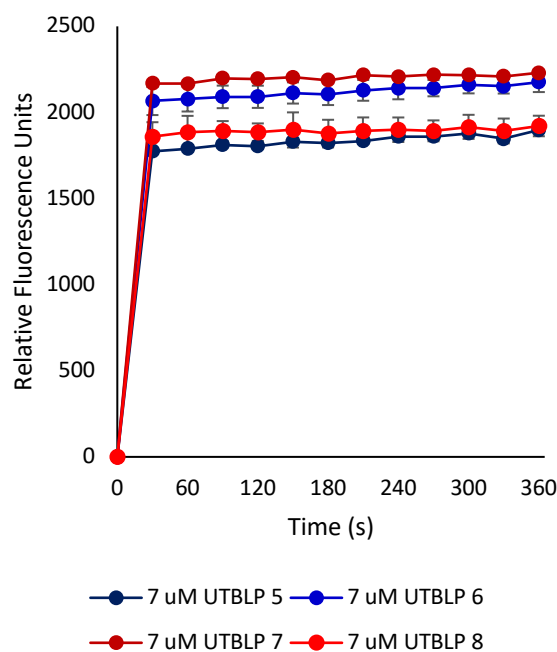

C

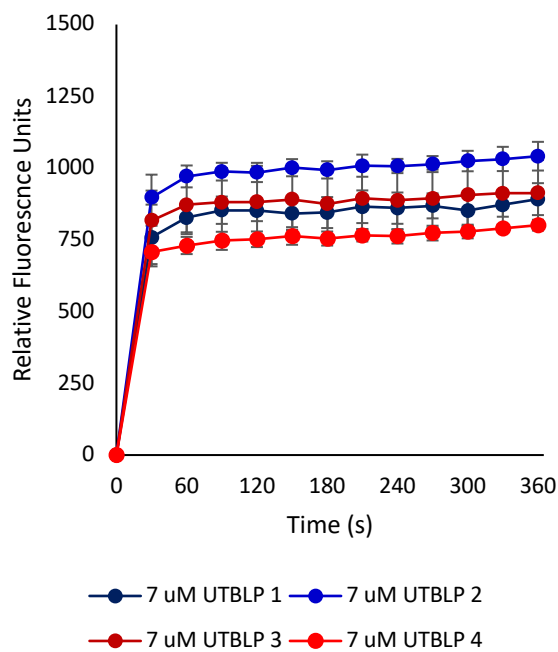

D

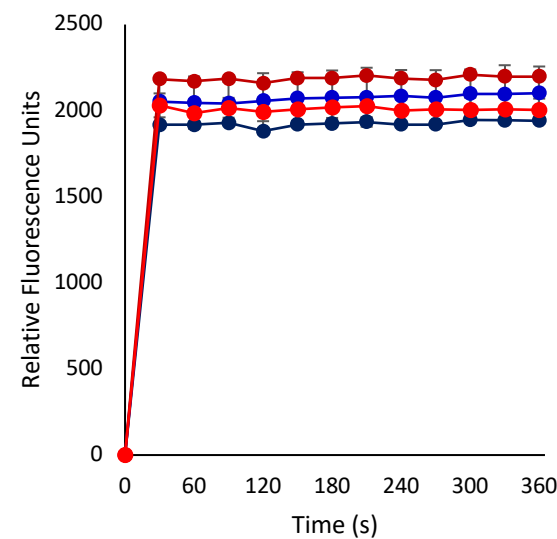

## NMR Spectra ( $^1\text{H}$ , $^{13}\text{C}$ , COSY, HSQC and HMBC) of UTBLPs 1-8

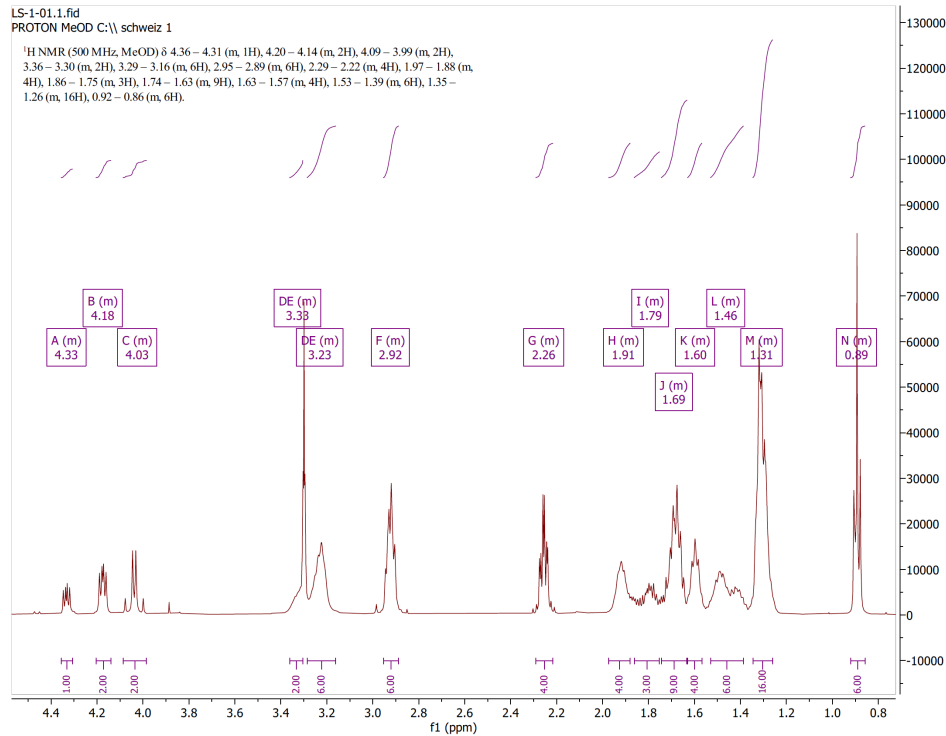

$^1\text{H}$  spectrum of UTBLP 1.

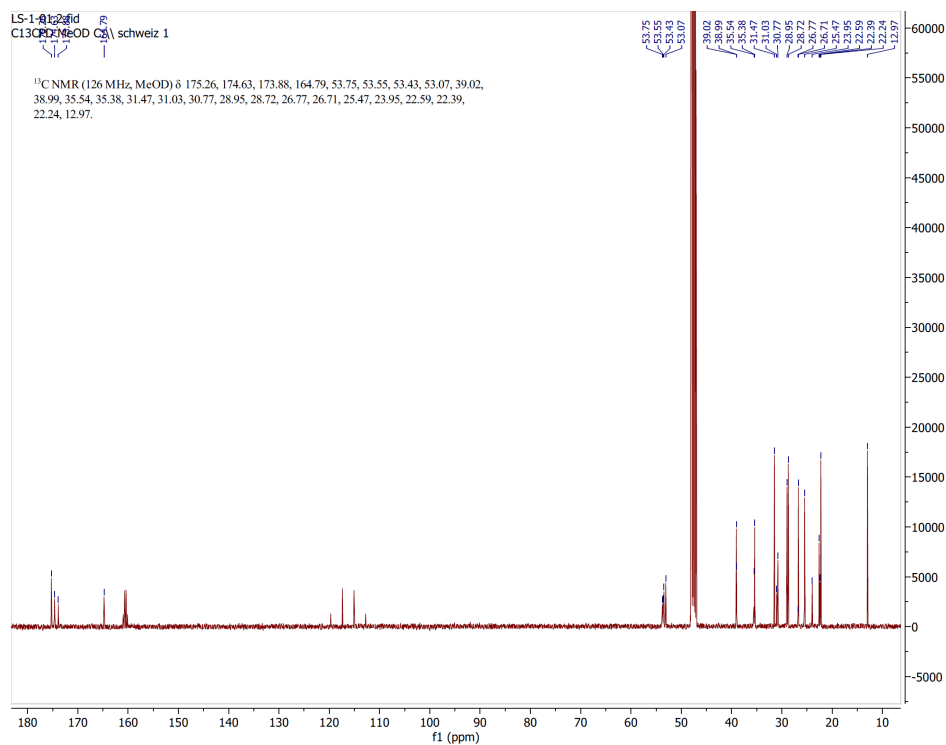

$^{13}\text{C}$  spectrum of UTBLP 1.



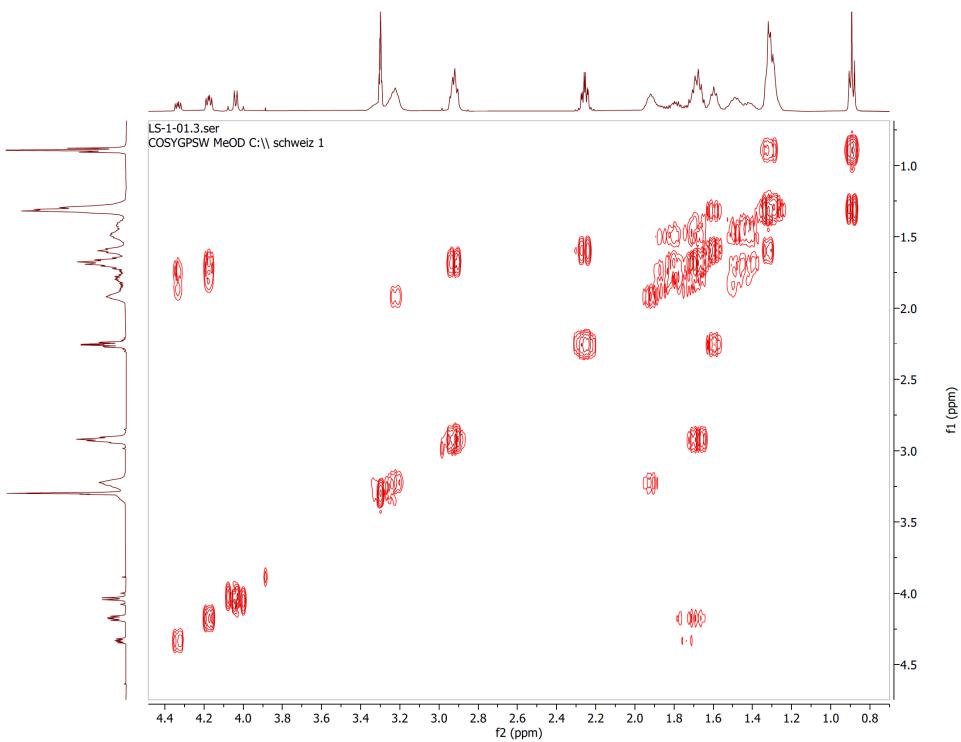

COSY spectrum of UTBLP 1.

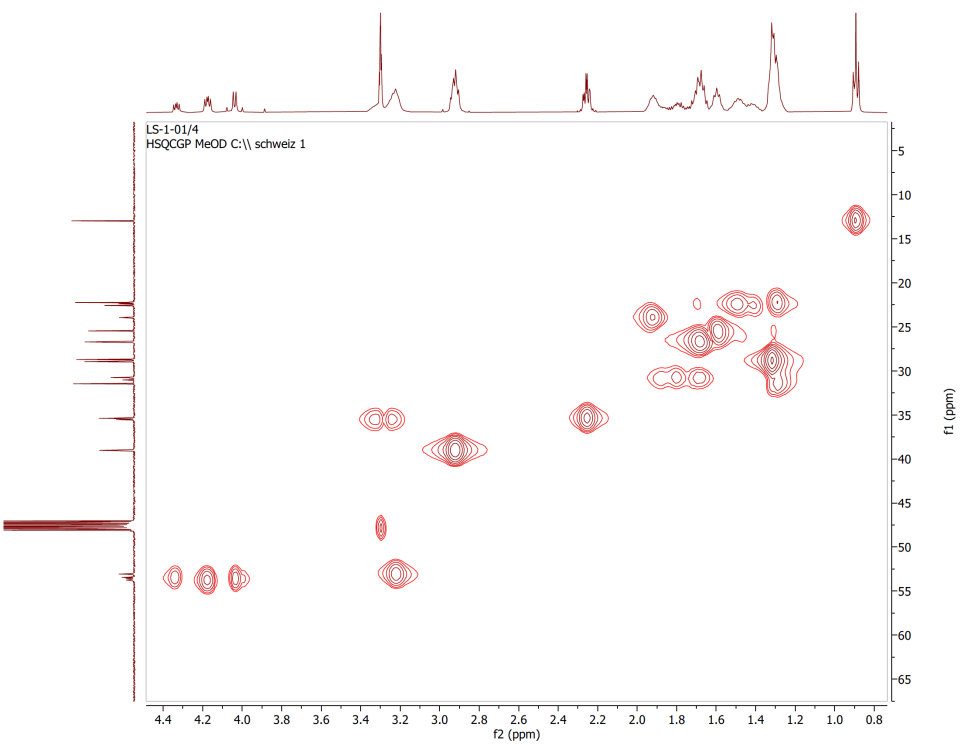

HSQC spectrum of UTBLP 1.

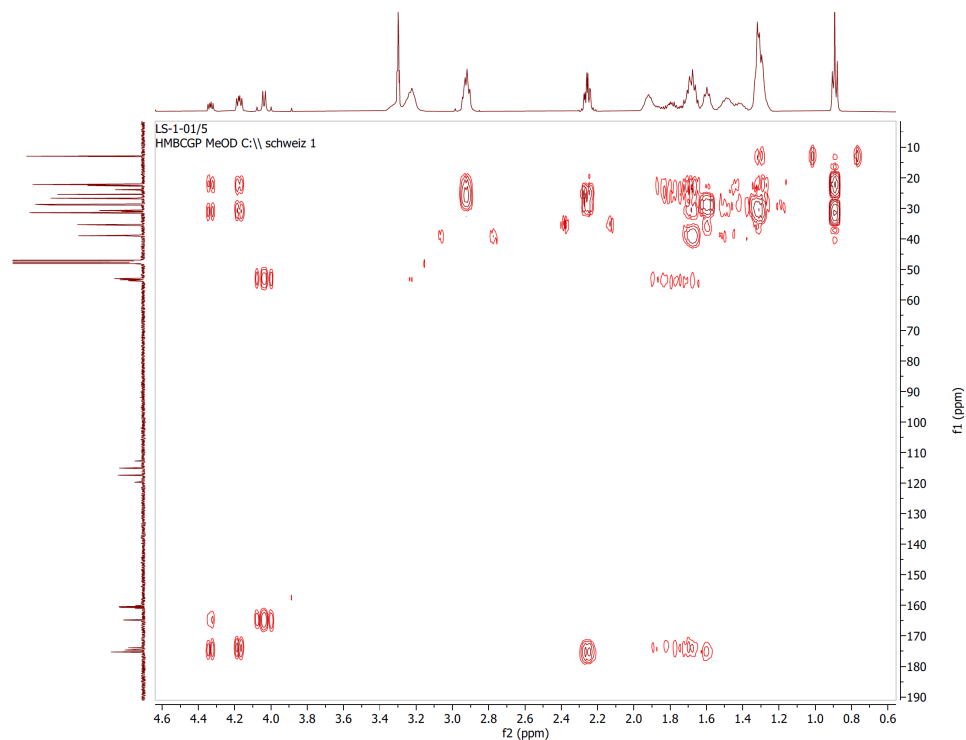

HMBC spectrum of UTBLP 1.

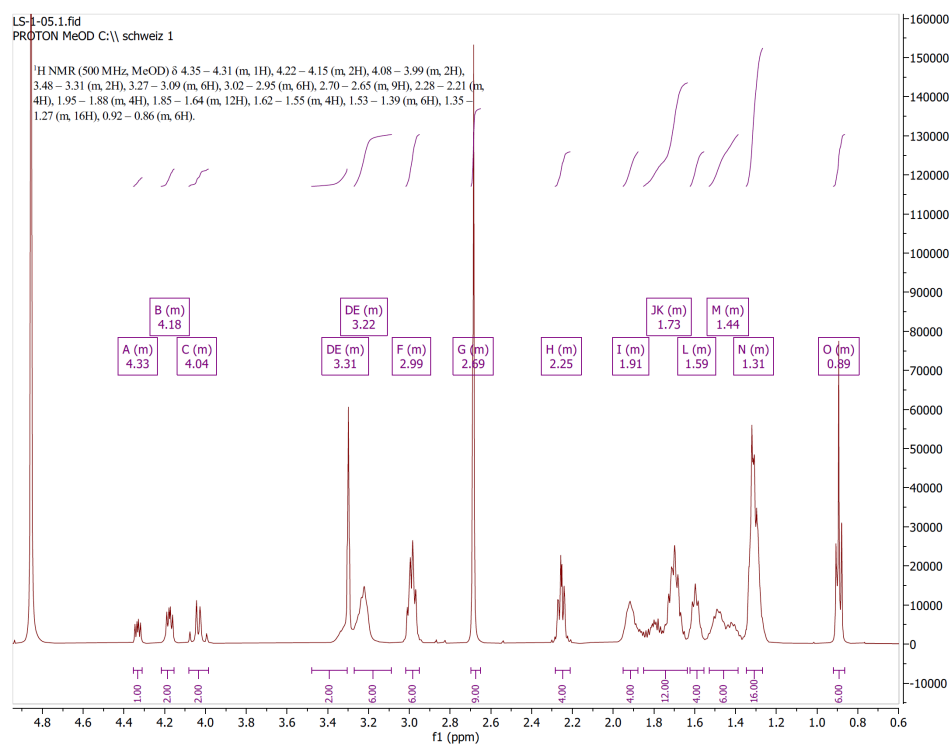

<sup>1</sup>H spectrum of UTBLP 2.

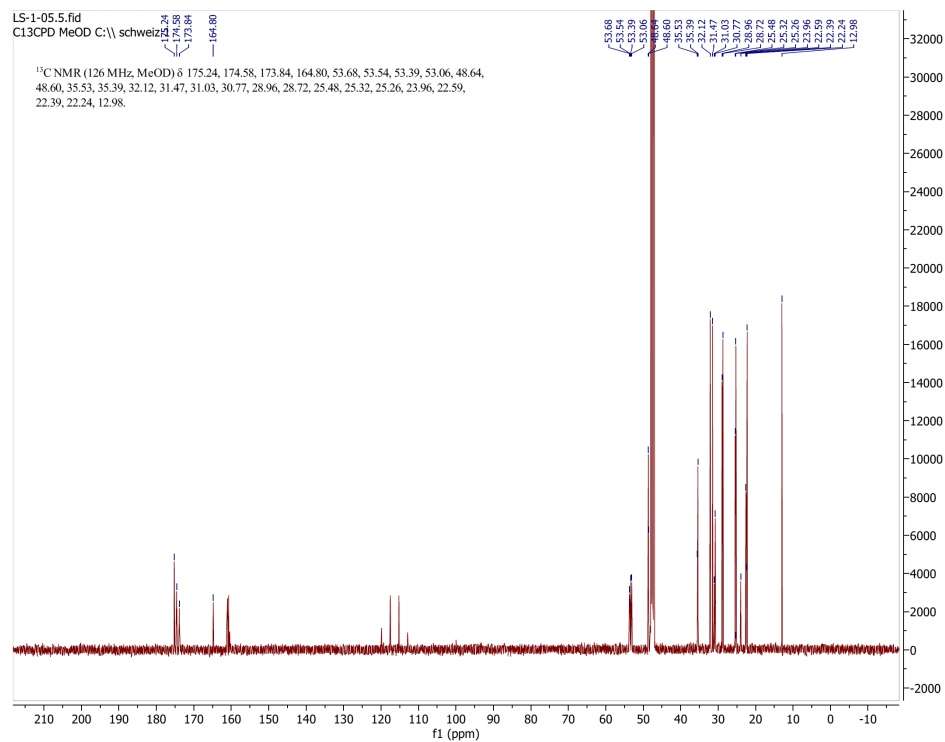

$^{13}\text{C}$  spectrum of UTBLP 2.

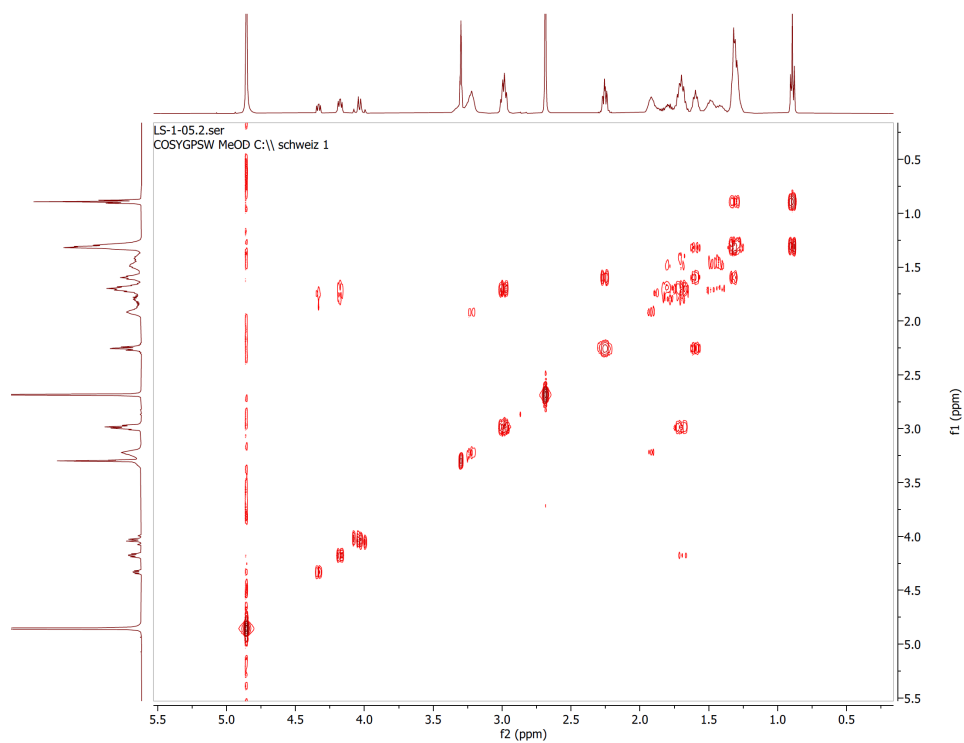

COSY spectrum of UTBLP 2.

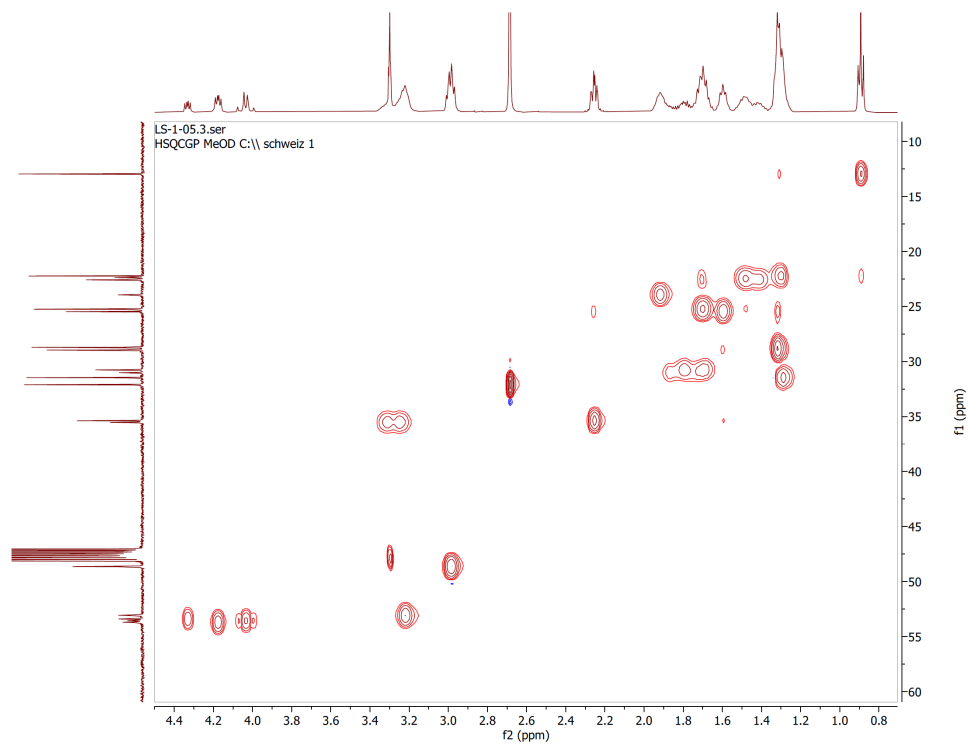

HSQC spectrum of UTBLP 2.

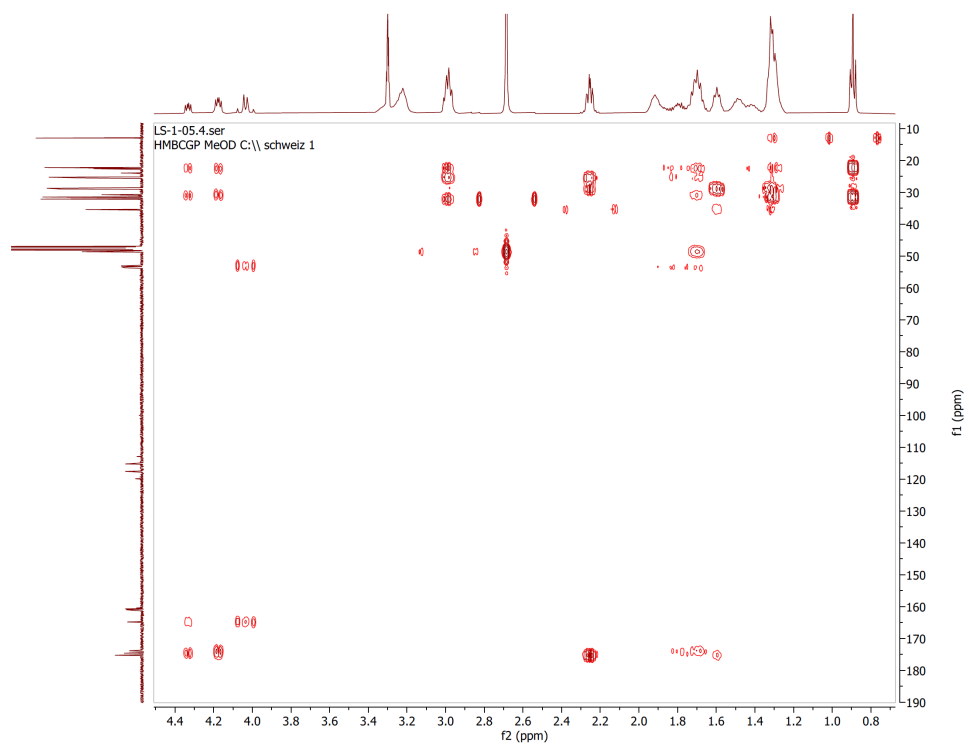

HMBC spectrum of UTBLP 2.

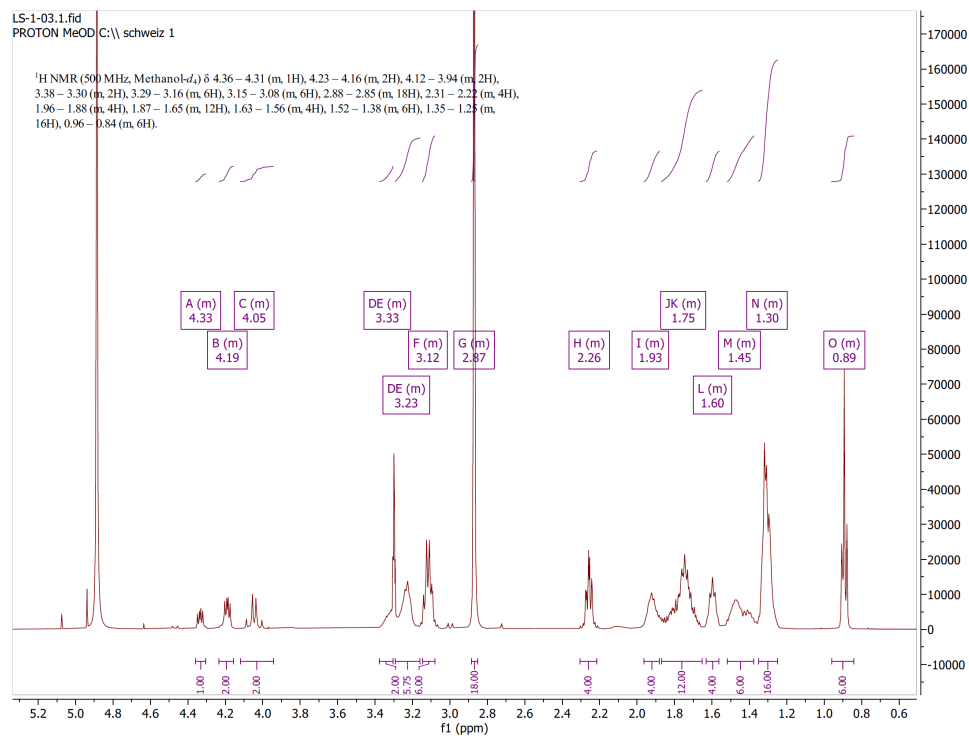

<sup>1</sup>H spectrum of UTBLP 3.

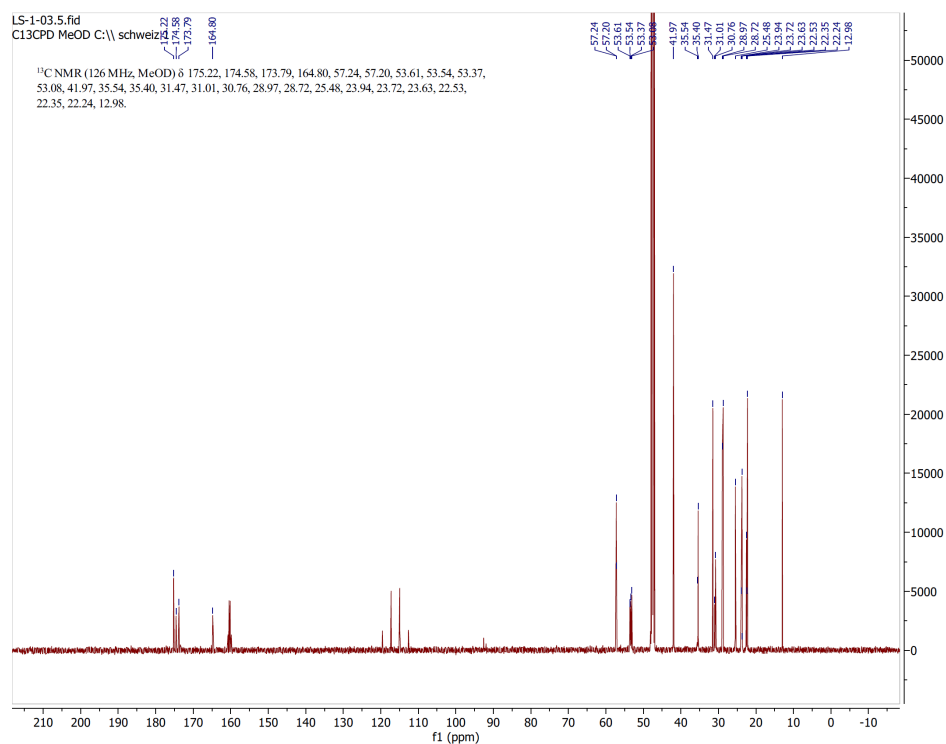

<sup>13</sup>C spectrum of UTBLP 3.

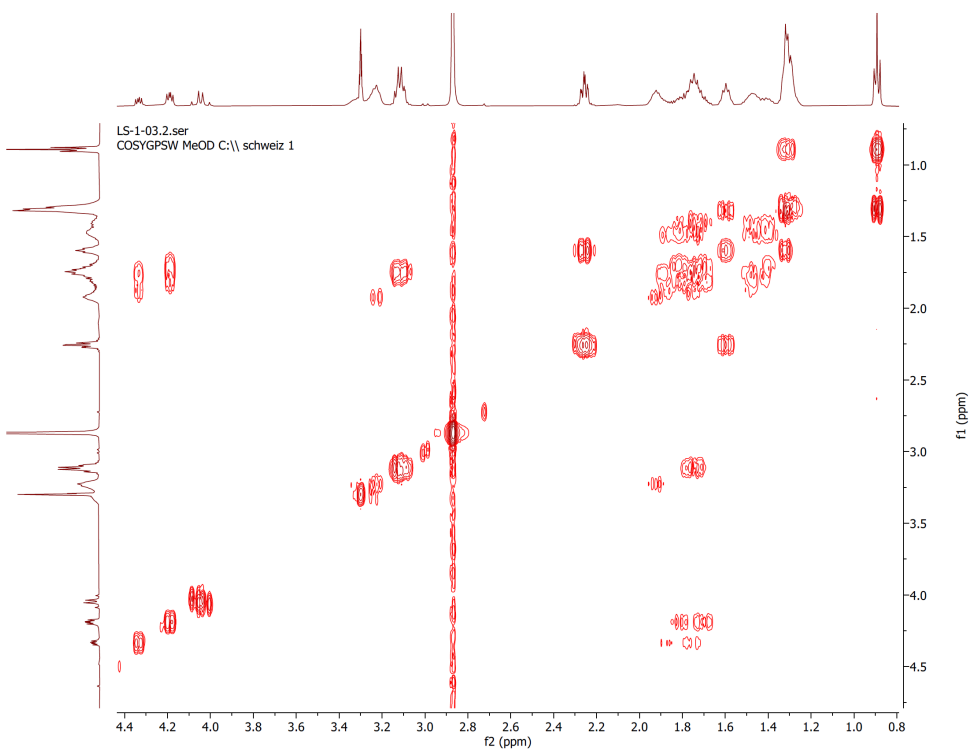

COSY spectrum of UTBLP **3**.

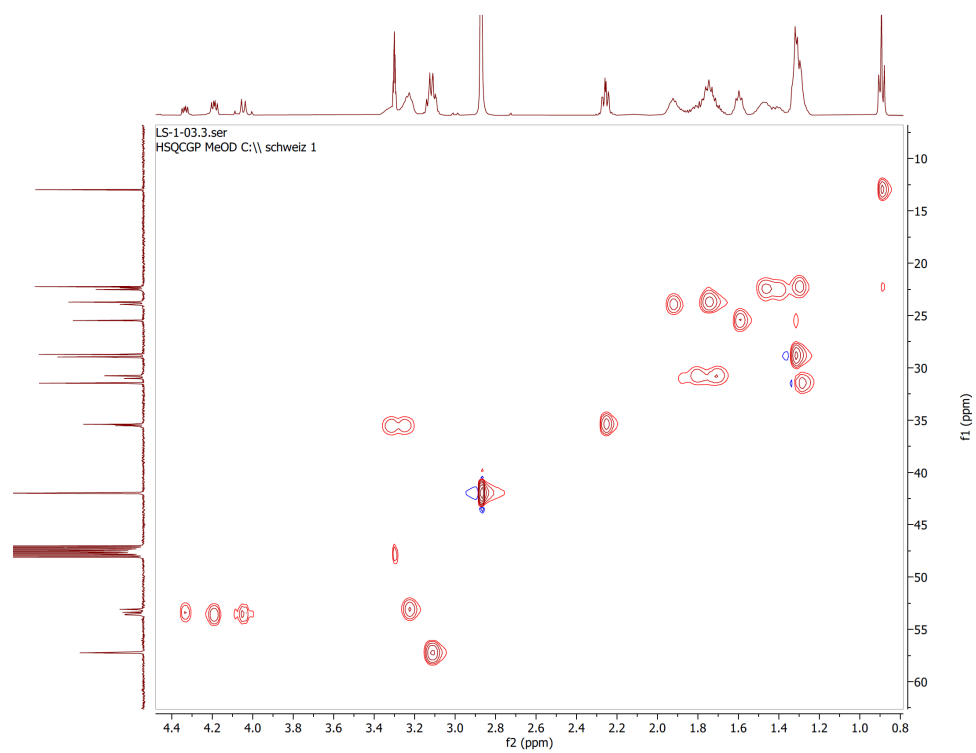

HSQC spectrum of UTBLP **3**.

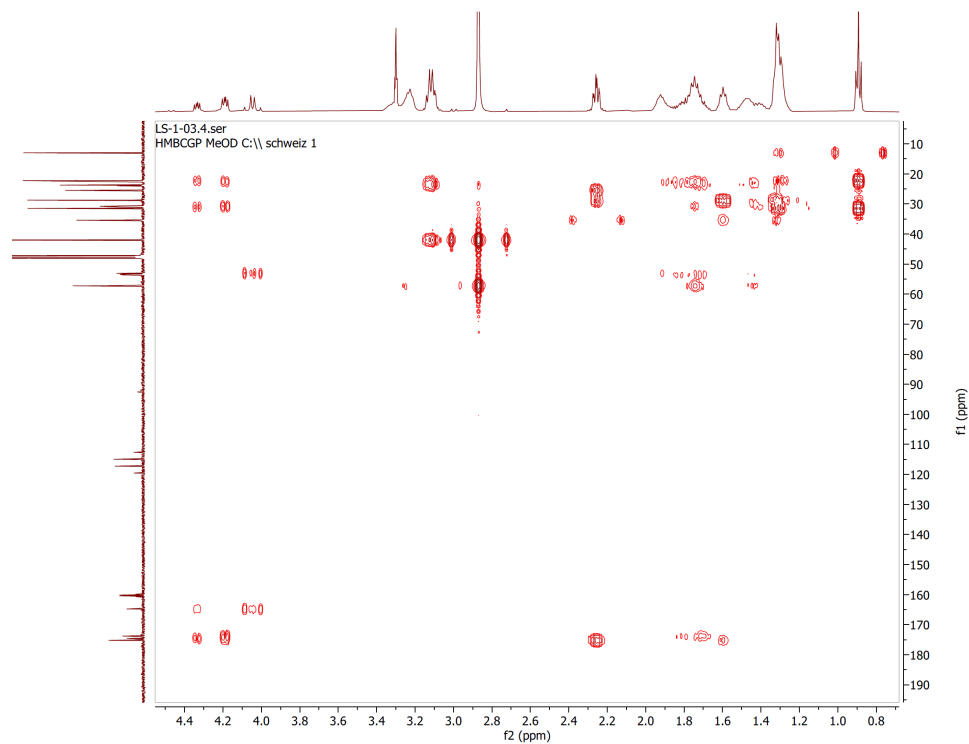

HMBC spectrum of UTBLP 3.

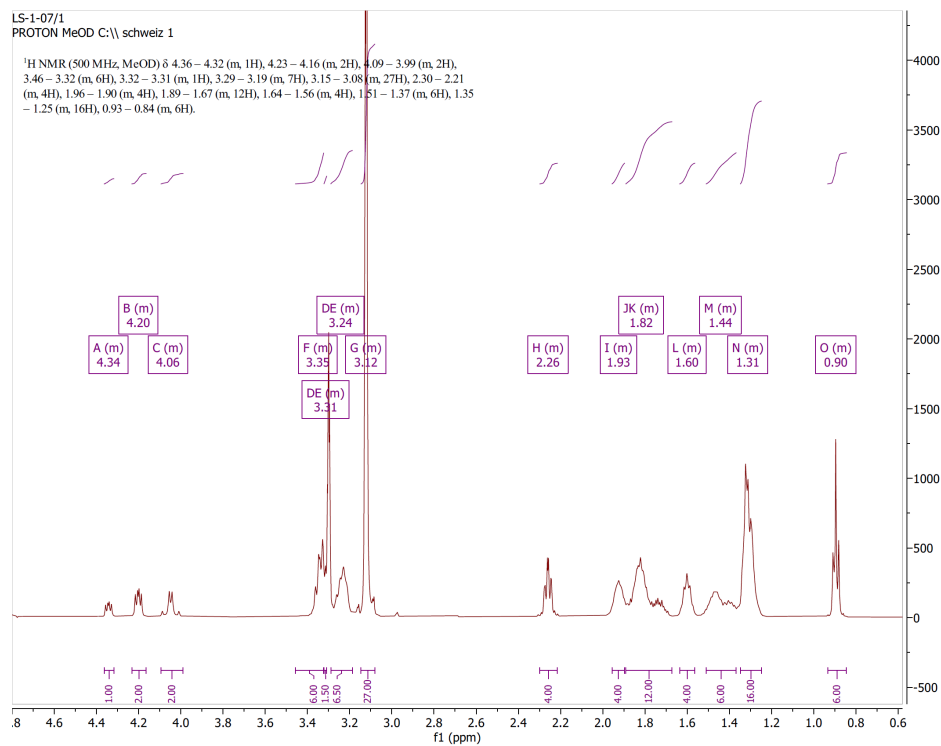

<sup>1</sup>H spectrum of UTBLP 4.

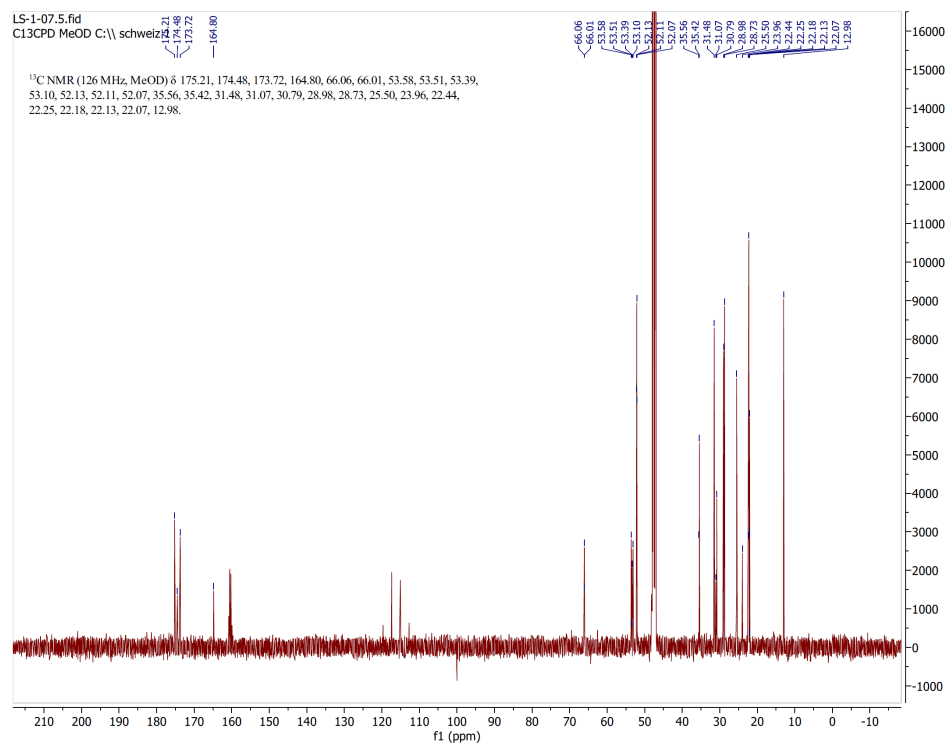

$^{13}\text{C}$  spectrum of UTBLP 4.

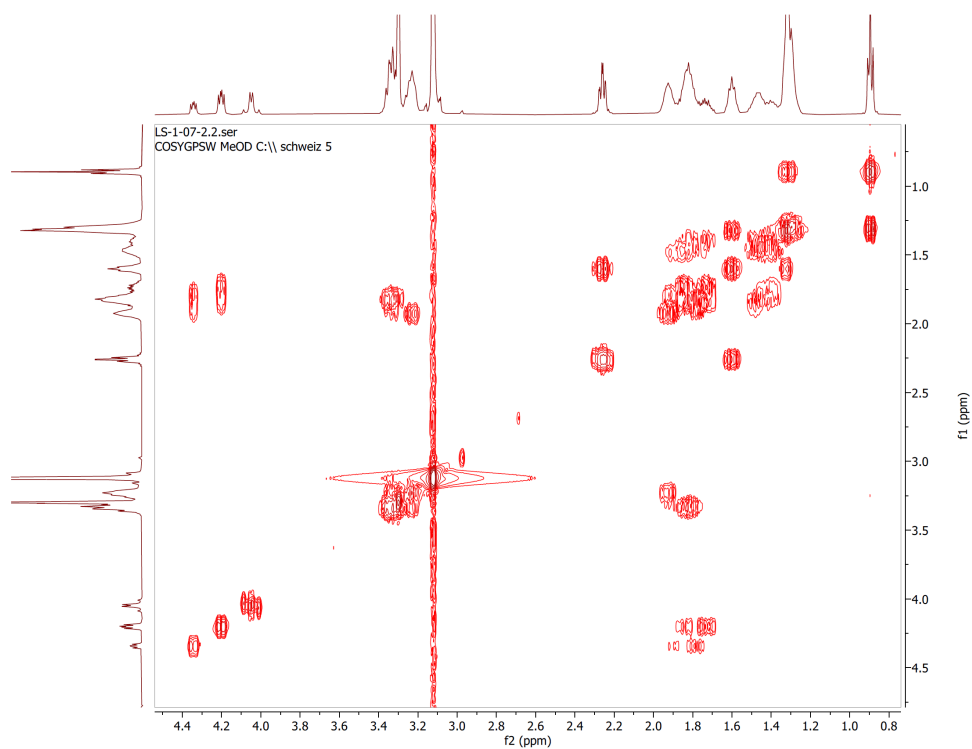

COSY spectrum of UTBLP 4.



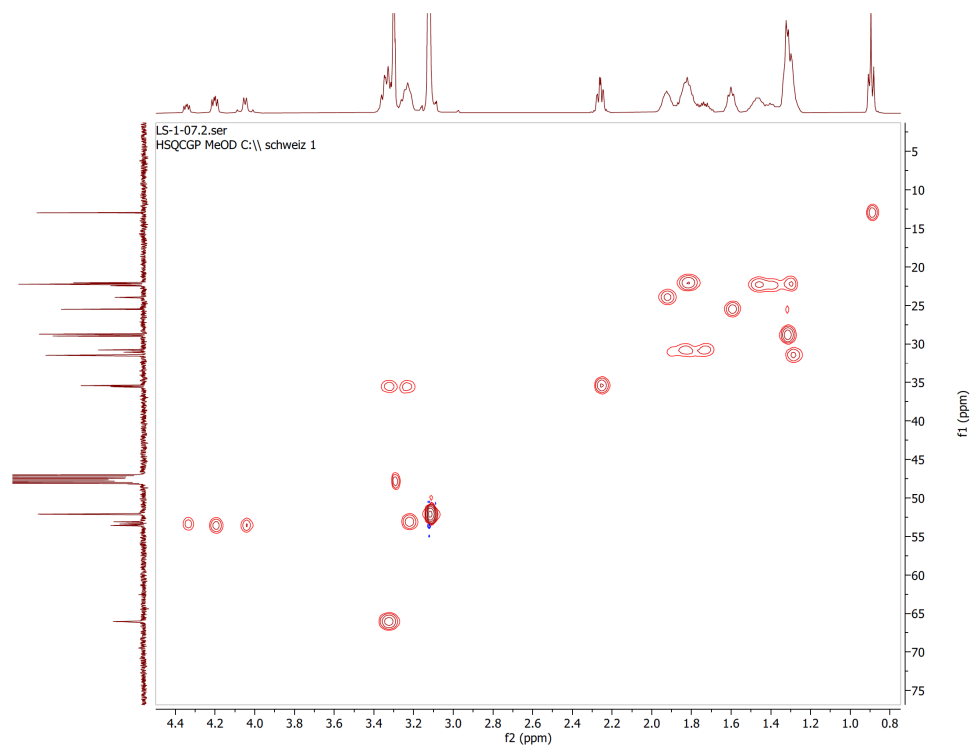

HSQC spectrum of UTBLP **4**.

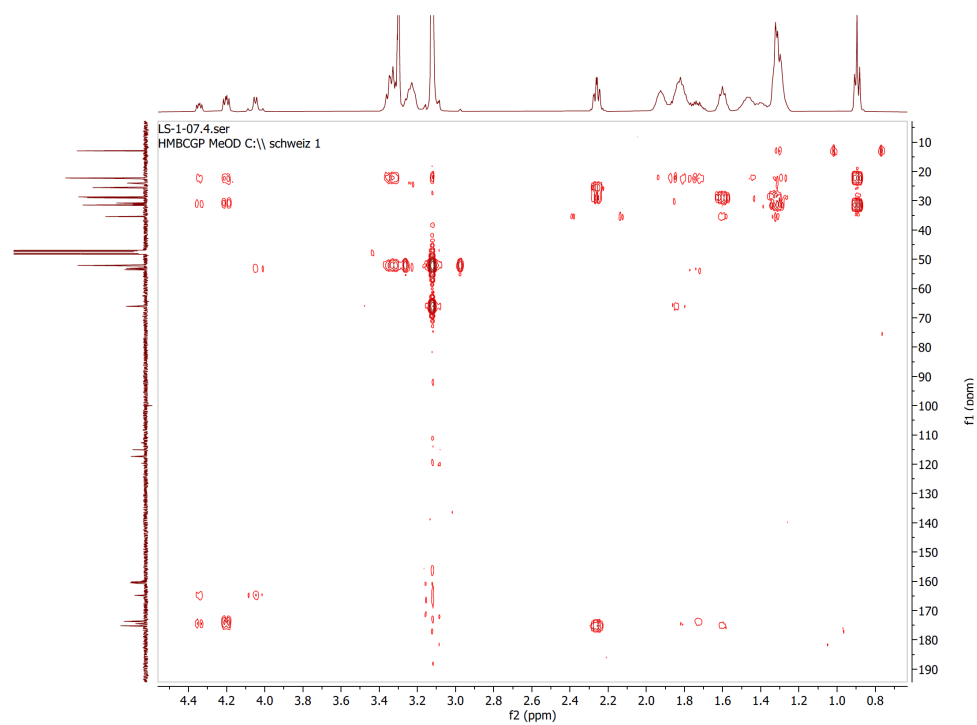

HMBC spectrum of UTBLP **4**.

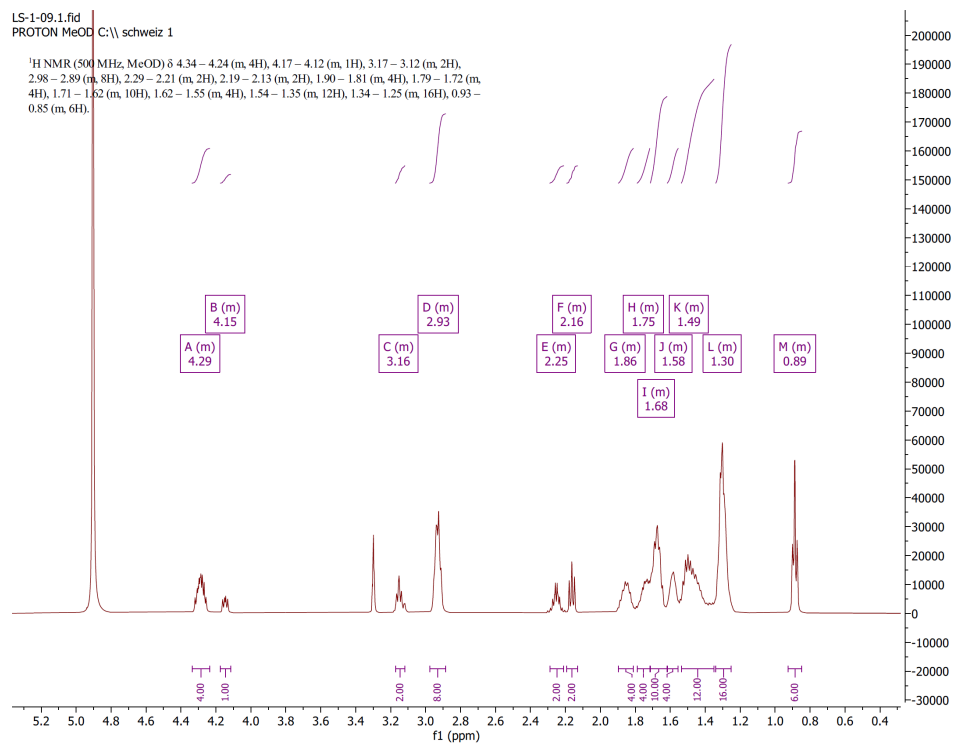

<sup>1</sup>H spectrum of UTBLP 5.

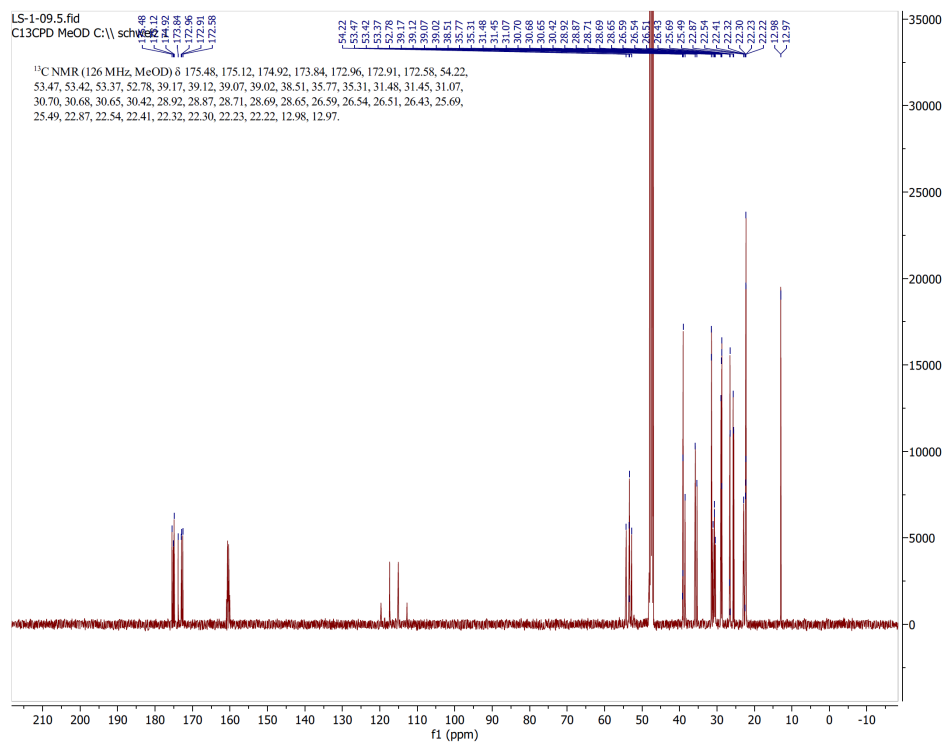

<sup>13</sup>C spectrum of UTBLP 5.

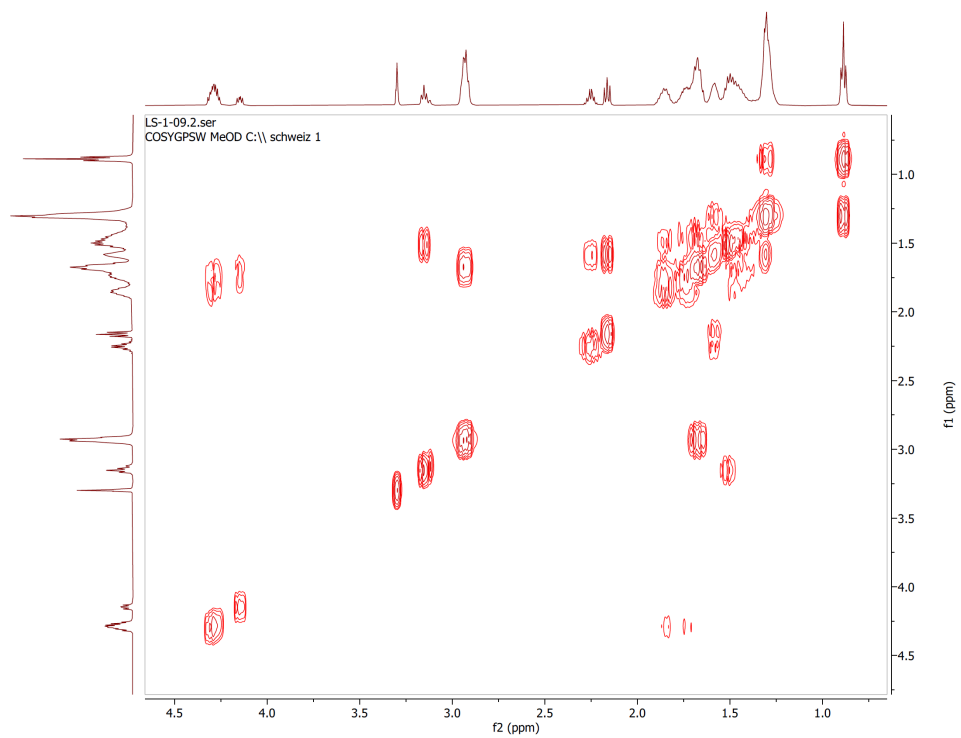

COSY spectrum of UTBLP 5.

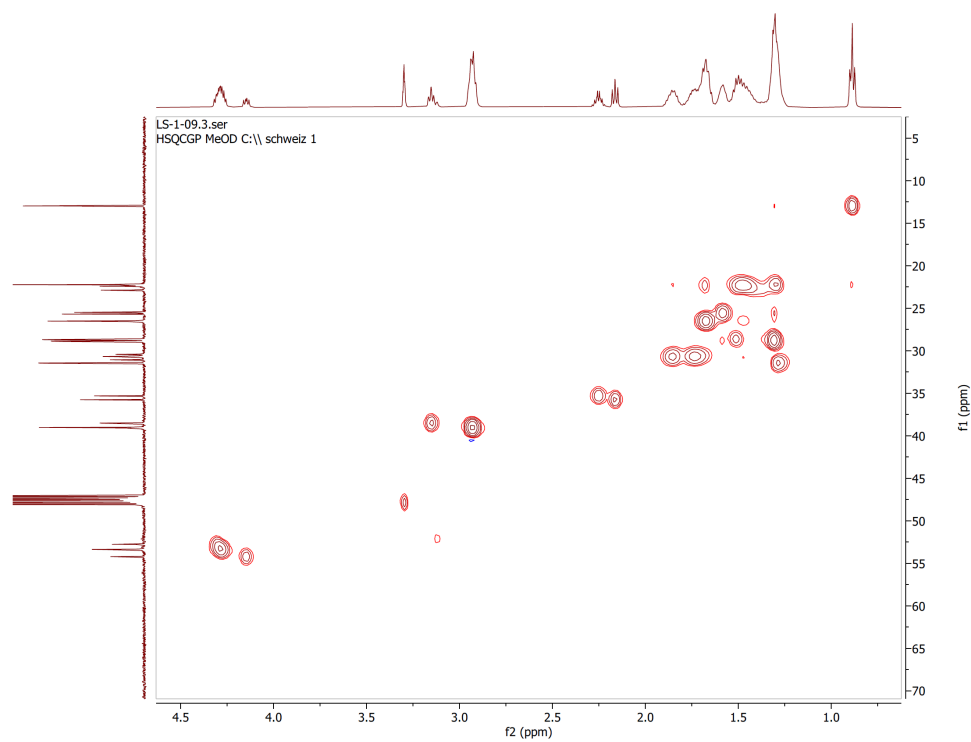

HSQC spectrum of UTBLP 5.

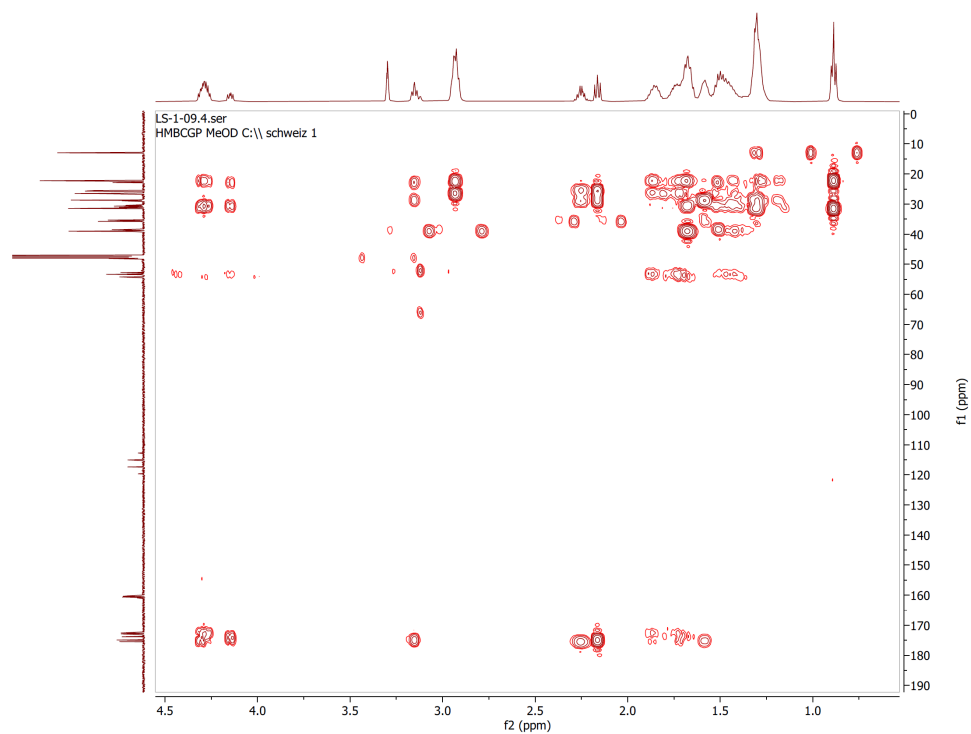

HMBC spectrum of UTBLP 5.

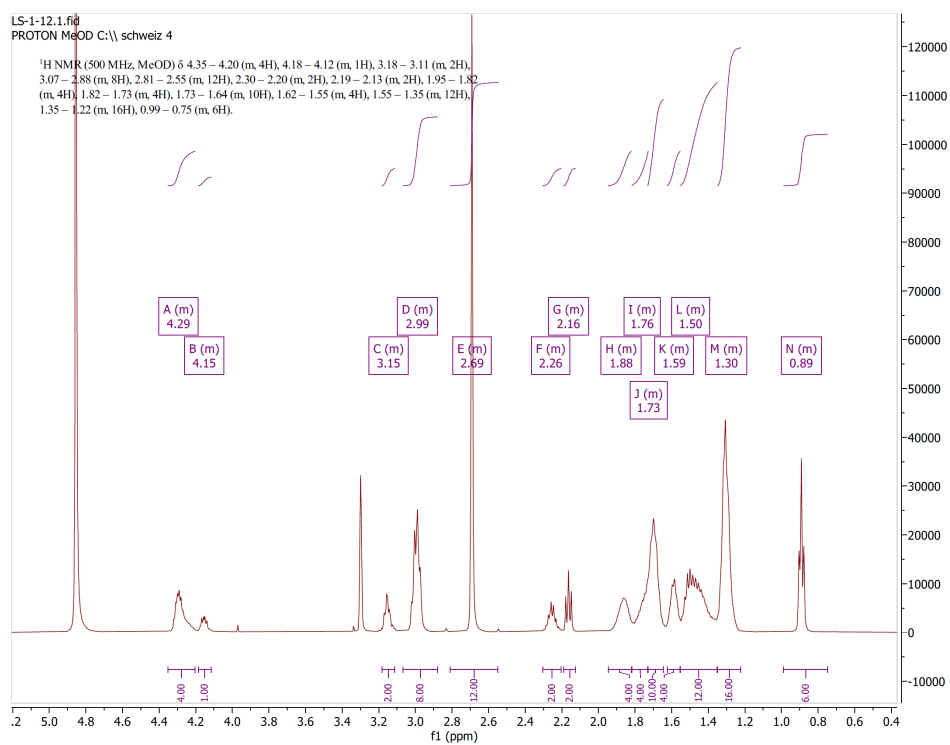

<sup>1</sup>H spectrum of UTBLP 6.

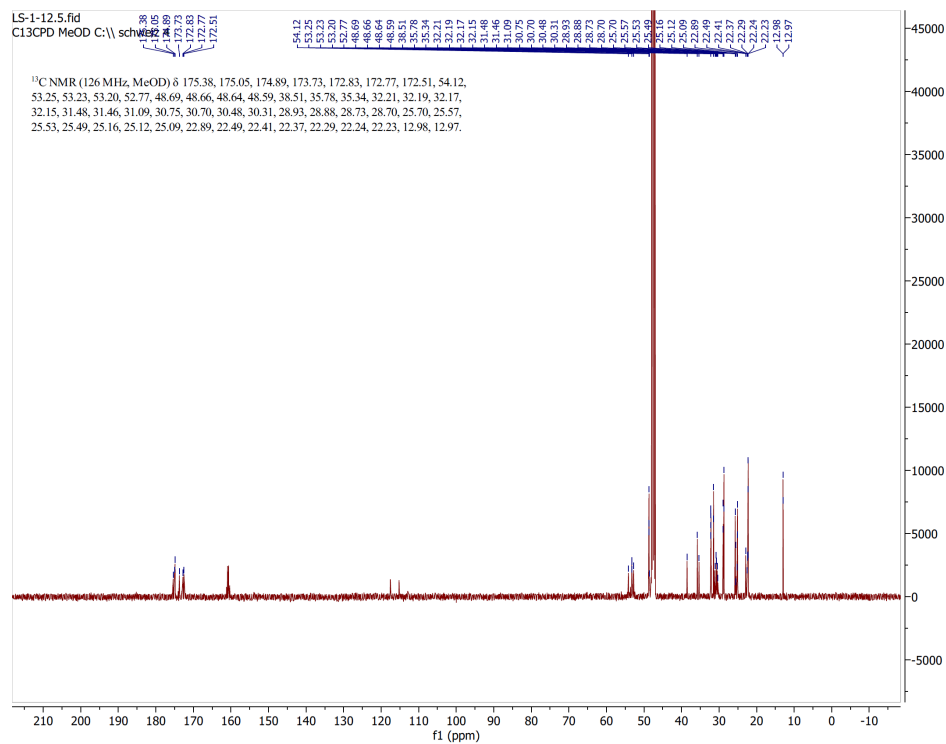

$^{13}\text{C}$  spectrum of UTBLP 6.

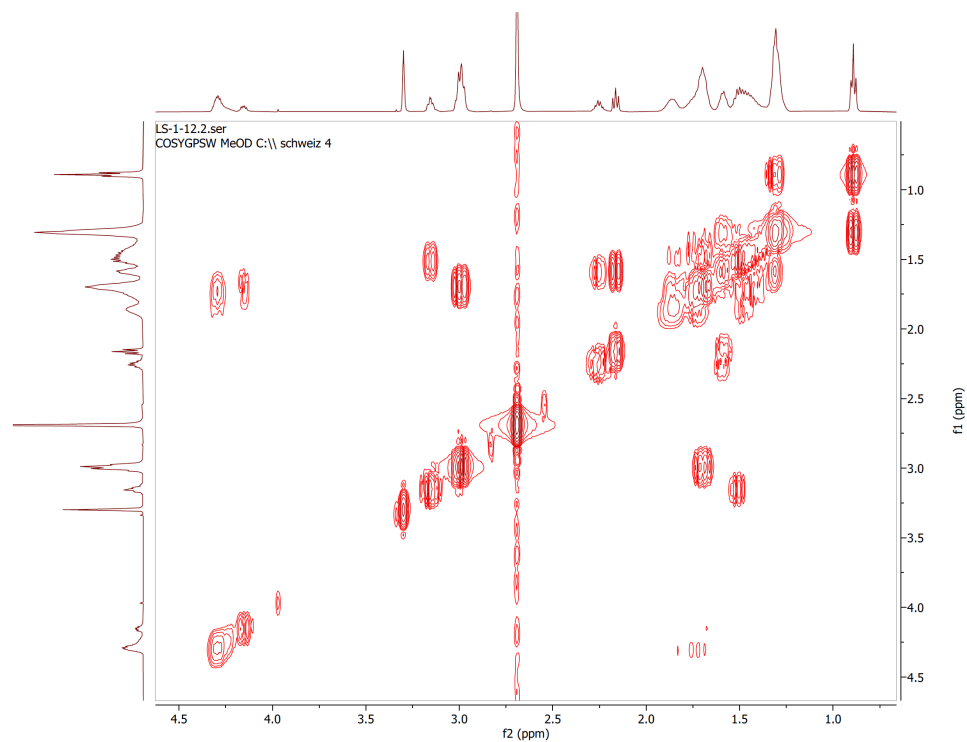

COSY spectrum of UTBLP 6.

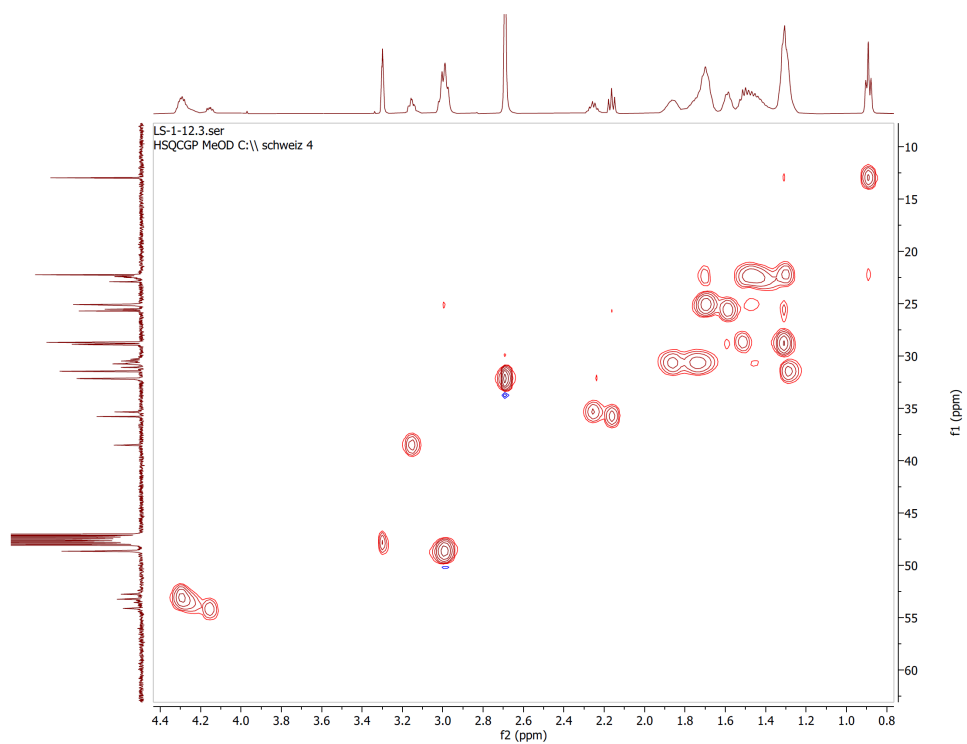

HSQC spectrum of UTBLP 6.

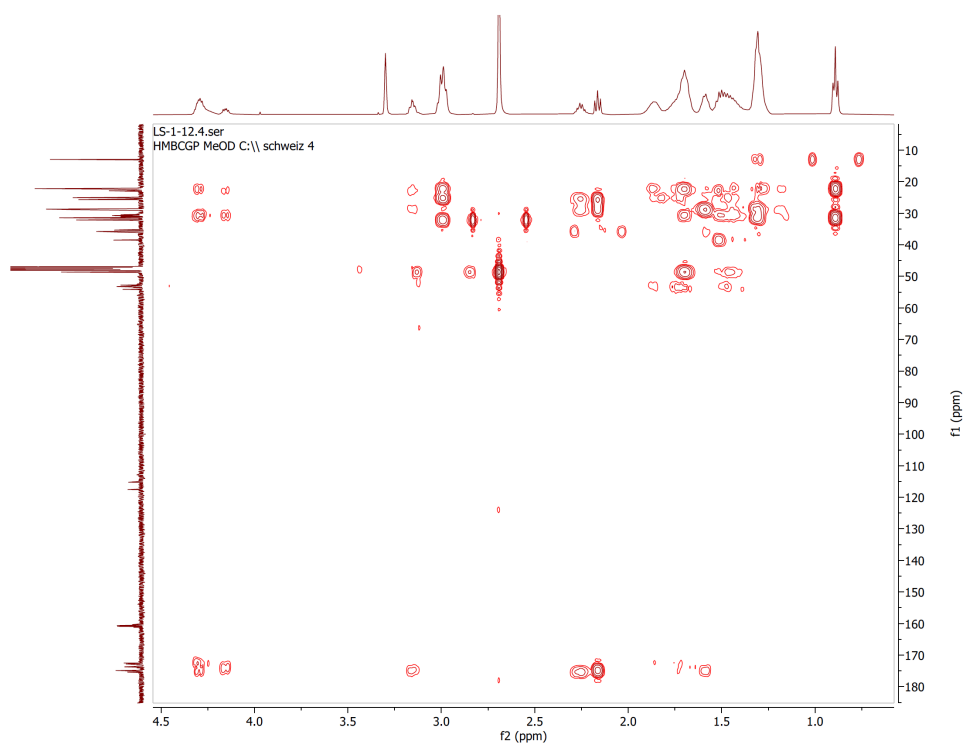

HMBC spectrum of UTBLP 6.

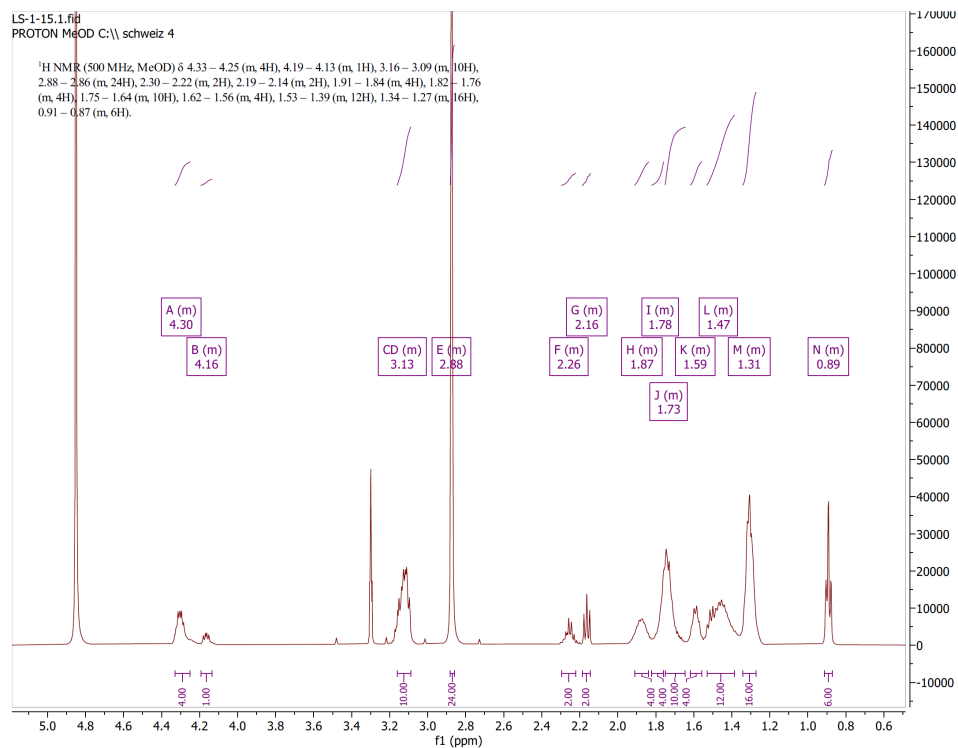

$^1\text{H}$  spectrum of UTBLP 7.

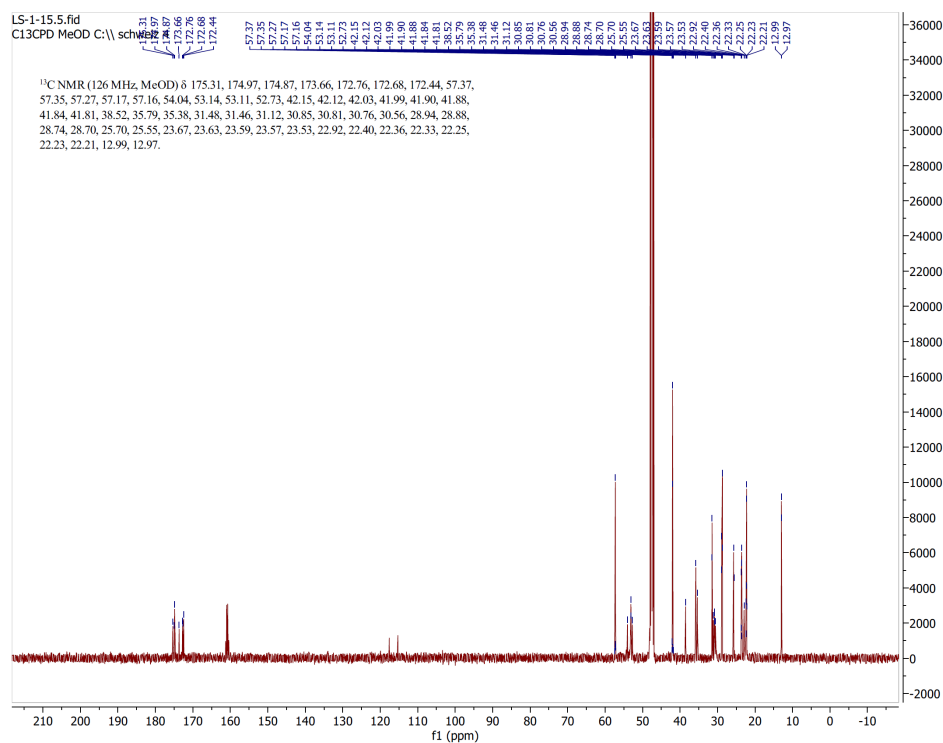

$^{13}\text{C}$  spectrum of UTBLP 7.

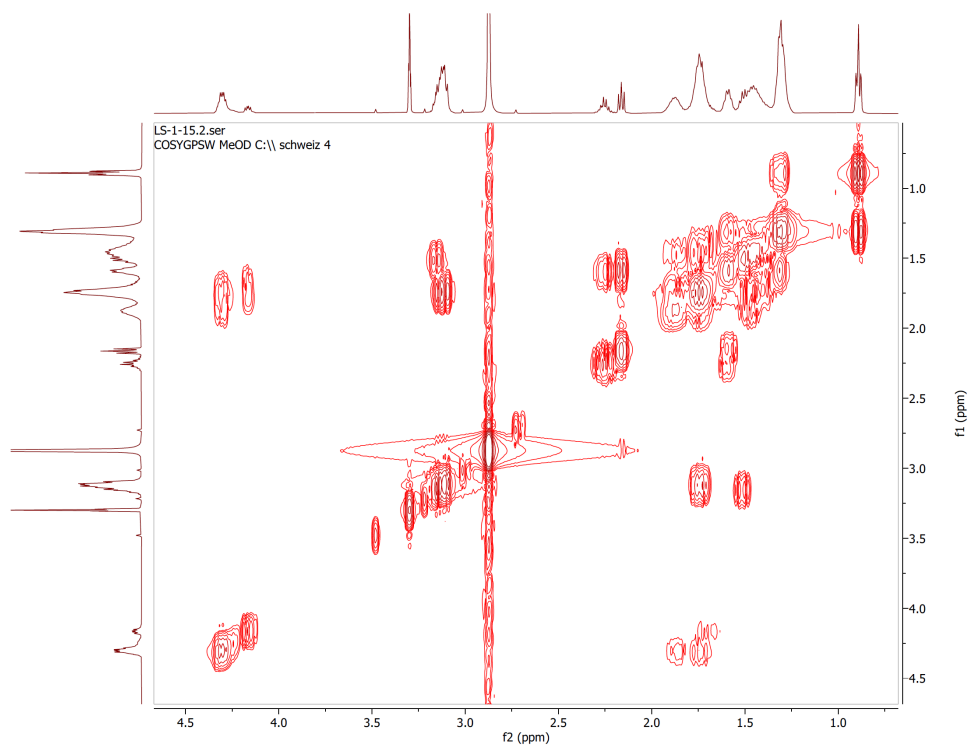

COSY spectrum of UTBLP 7.

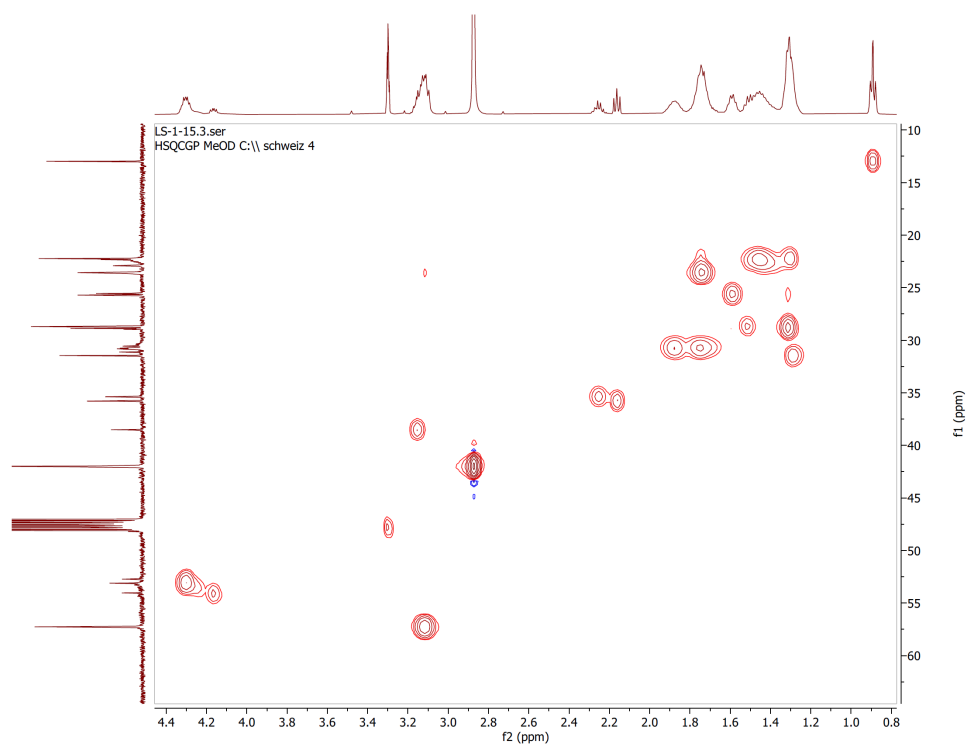

HSQC spectrum of UTBLP 7.



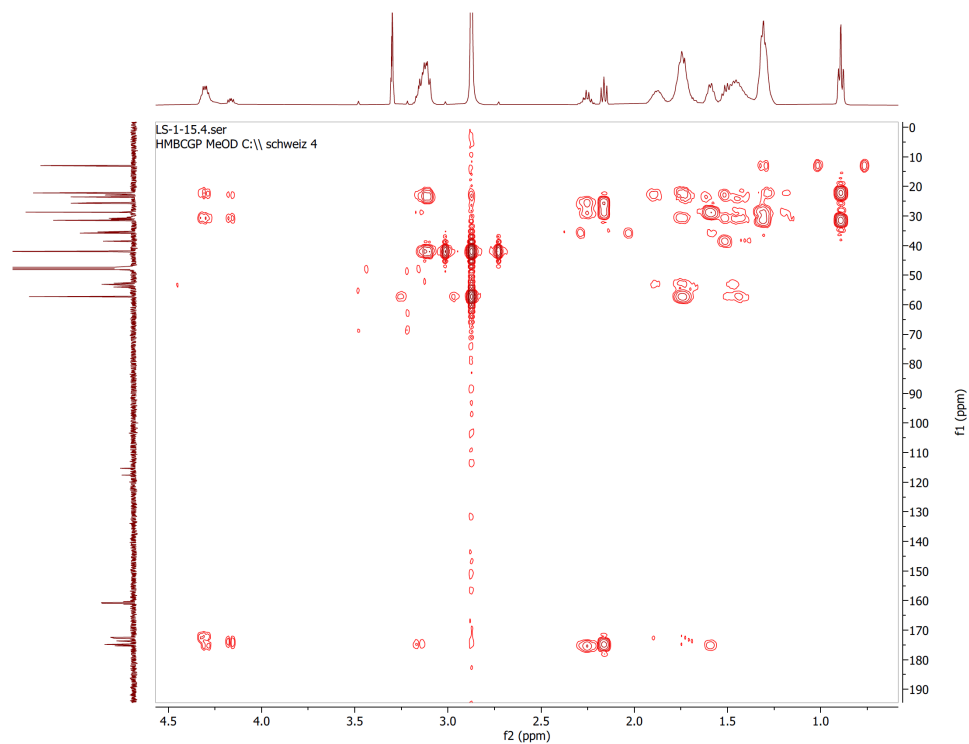

HMBC spectrum of UTBLP 7.

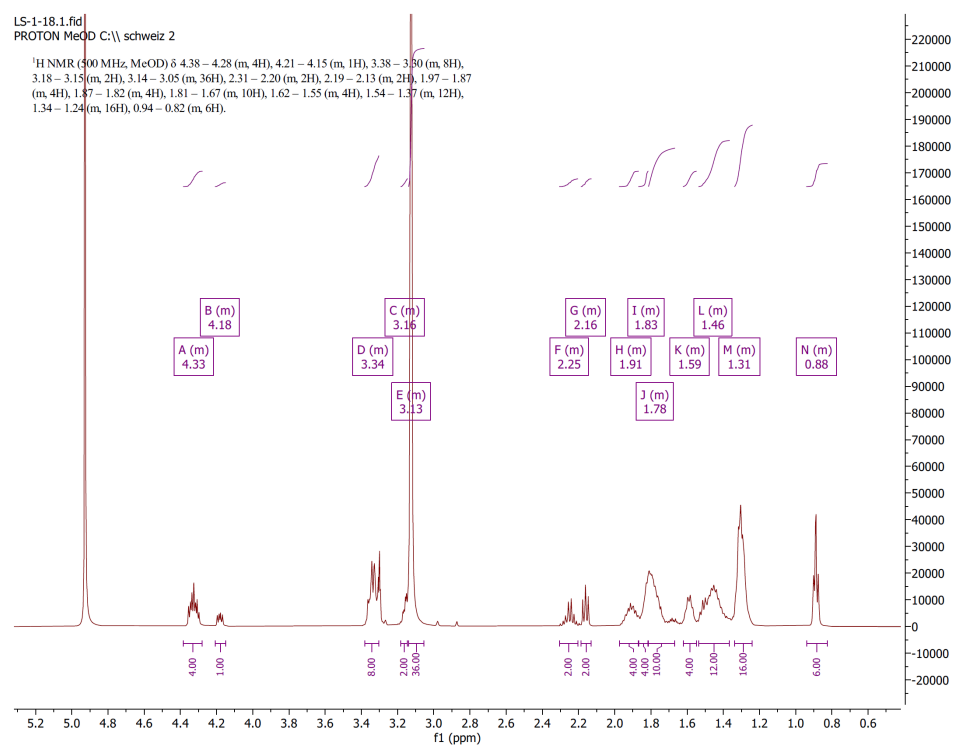

<sup>1</sup>H spectrum of UTBLP 8.

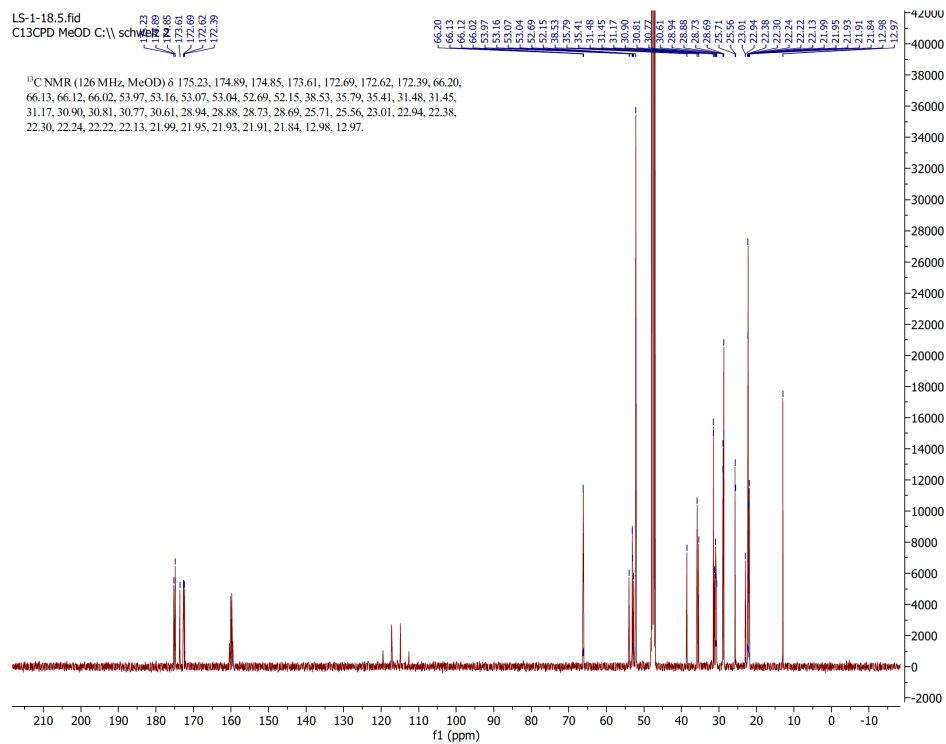

$^{13}\text{C}$  spectrum of UTBLP **8**.

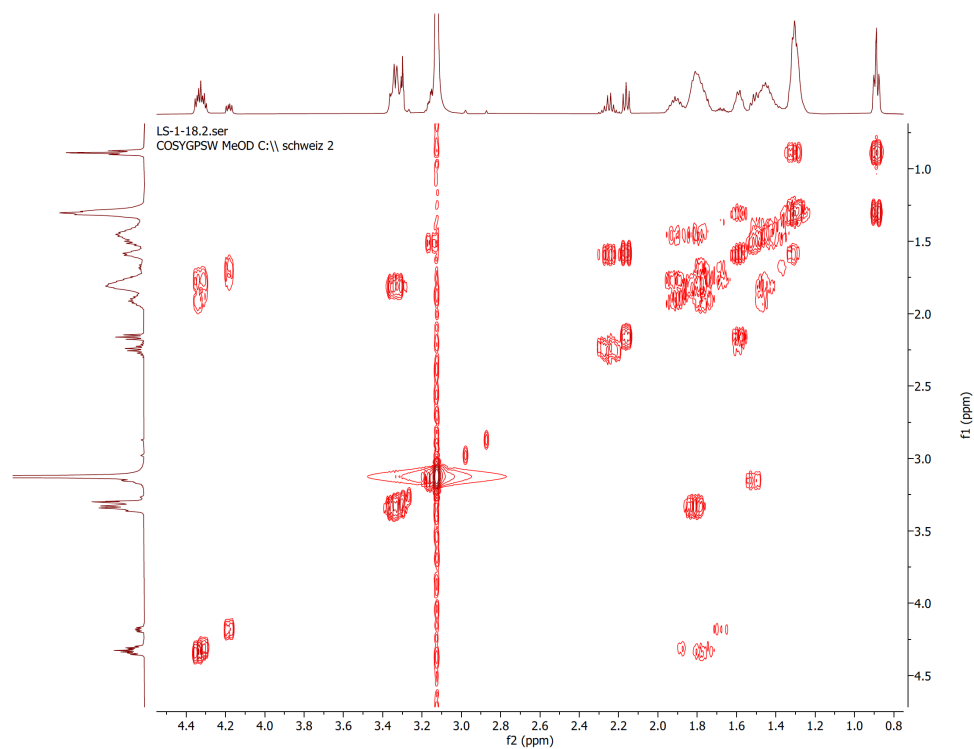

COSY spectrum of UTBLP **8**.

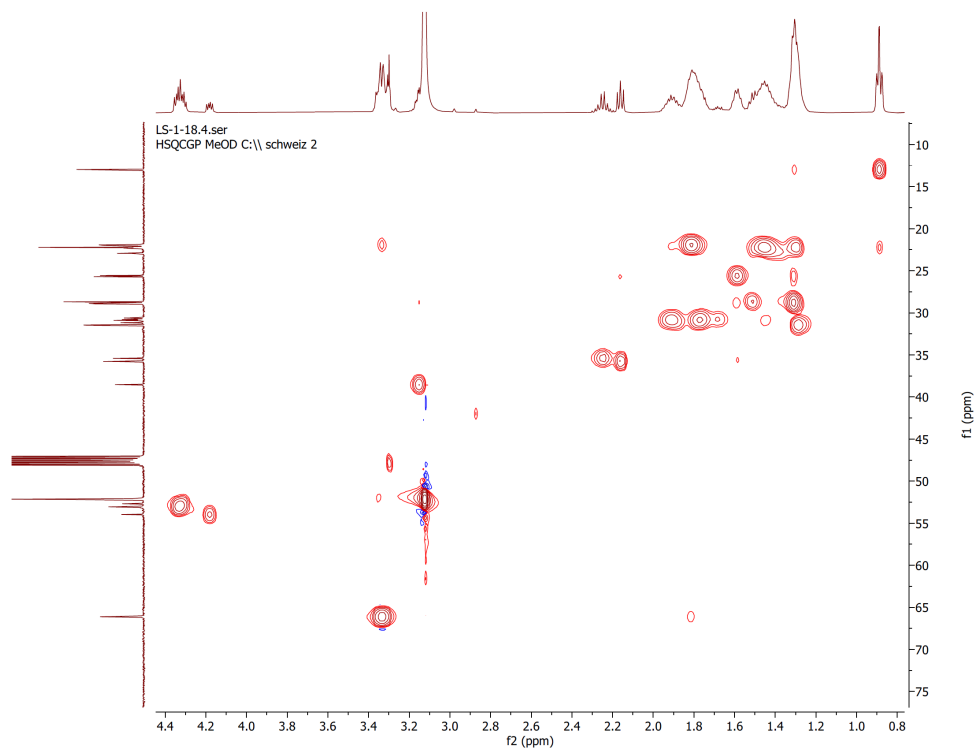

HSQC spectrum of UTBLP **8**.

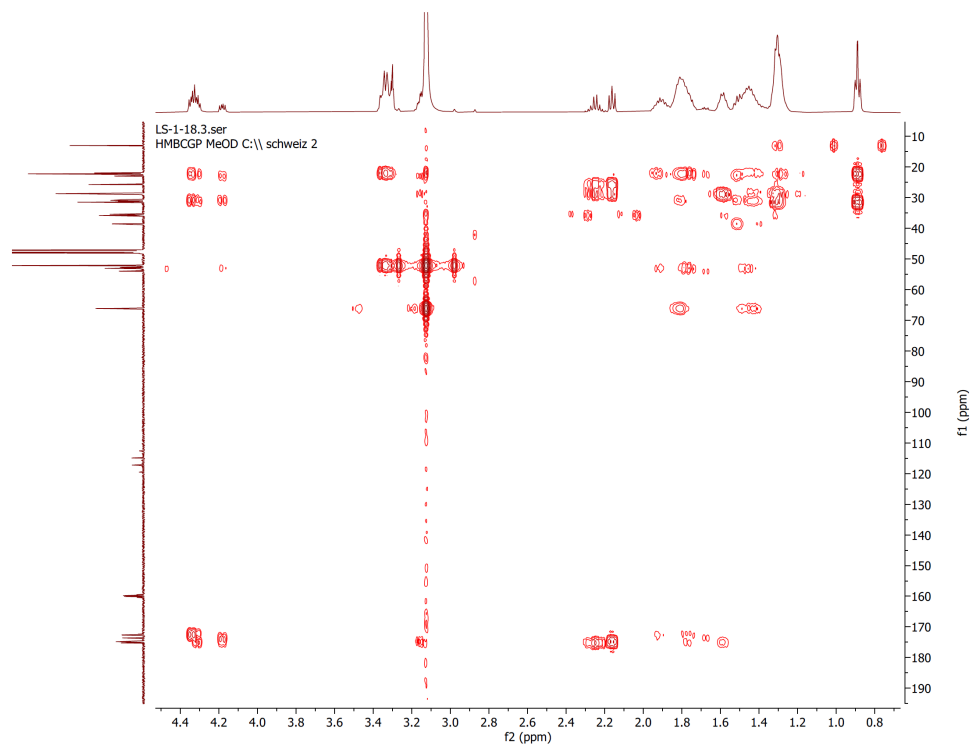

HMBC spectrum of UTBLP **8**.

**Table S5.** MICs (in  $\mu\text{g/mL}$ ) of various antibiotics against MDR GNB used in the study.

| <i>P. aeruginosa</i> | PTZ | A/C | AZT | FOX | CFZ  | CTR | CPM | CTX  | CAZ | IMI | MER  | DOR   | ETP | CIP | LEV | MOX | TOB  | GEN | AMK | TGC | MIN | DOX  | ERC | OMC | CST | CAM  |
|----------------------|-----|-----|-----|-----|------|-----|-----|------|-----|-----|------|-------|-----|-----|-----|-----|------|-----|-----|-----|-----|------|-----|-----|-----|------|
| 259-96196            | 64  | >32 | 32  | >32 | >128 | >64 | >64 | 2048 | 512 | 32  | 1024 | >1024 | >32 | >16 | 256 | >16 | 256  | >32 | >64 | 32  | 32  | 32   | 8   | 64  | 1   | 1024 |
| 262-101856           | 64  | >32 | 32  | >32 | >128 | 64  | 32  | 128  | 16  | 32  | 32   | 16    | >32 | >16 | 64  | >16 | 1024 | >32 | >64 | 32  | 64  | 1024 | 8   | 64  | 1   | 2048 |

| <i>A. baumannii</i> | PTZ | FOX | CFZ  | CPM  | CTX  | CAZ | C/T | IMI | MER | CIP   | LEV | MOX | TOB | GEN | AMK | TGC  | MIN   | DOX | ERC | OMC | CST  | CAM |
|---------------------|-----|-----|------|------|------|-----|-----|-----|-----|-------|-----|-----|-----|-----|-----|------|-------|-----|-----|-----|------|-----|
| AB027               | 512 | ND  | >128 | >128 | >256 | ND  | >16 | 32  | 16  | >16   | 8   | 8   | ND  | 32  | >64 | 4    | 0.25  | ND  | 0.5 | 1   | 0.25 | 128 |
| 92247               | <1  | 32  | 128  | 4    | ND   | ND  | 2   | ND  | 4   | ≤0.06 | ND  | ND  | ND  | ND  | <1  | 0.25 | 0.125 | ND  | ND  | ND  | 4    | ND  |

| <i>E. coli</i>  | PTZ | A/C | AZT   | FOX | CFZ | CPM   | CAZ   | C/T  | IMI  | MER   | ETP   | CIP | LEV | MOX | TOB  | GEN  | AMK | TGC  | MIN | DOX | ERC | OMC | CST | CAM |
|-----------------|-----|-----|-------|-----|-----|-------|-------|------|------|-------|-------|-----|-----|-----|------|------|-----|------|-----|-----|-----|-----|-----|-----|
| 94393 (mcr-1 +) | ≤1  | 4   | ≤0.12 | 4   | 1   | ≤0.25 | ≤0.25 | 0.25 | 0.25 | ≤0.03 | ≤0.03 | 0.5 | 1   | 1   | ≤0.5 | ≤0.5 | 2   | 0.25 | 2   | 4   | 0.5 | 4   | 4   | 4   |
| 94474 (mcr-1 +) | 16  | >32 | ≤0.12 | 16  | 4   | ≤0.25 | 0.5   | 0.5  | 0.25 | ≤0.03 | ≤0.03 | >16 | 32  | 16  | 32   | 16   | 2   | 1    | 64  | >32 | 1   | 16  | 16  | 4   |

| <i>E. cloacae</i> | PTZ | A/C | AZT   | FOX | CFZ  | CPM  | CAZ | C/T | IMI | MER  | ETP | CIP  | MOX  | TOB | GEN | AMK | TGC | MIN | DOX | ERC | OMC | CST | CAM |
|-------------------|-----|-----|-------|-----|------|------|-----|-----|-----|------|-----|------|------|-----|-----|-----|-----|-----|-----|-----|-----|-----|-----|
| 118564            | 2   | >32 | ≤0.12 | >32 | >128 | 0.25 | 0.5 | ND  | ND  | 0.12 | ND  | 0.06 | 0.12 | 1   | 1   | 2   | ND  | ND  | 4   | ND  | ND  | >16 | ND  |

| <i>K. pneumoniae</i> | PTZ | A/C | AZT   | FOX | CFZ | CPM | CAZ | C/T | IMI  | MER   | ETP   | CIP   | LEV   | MOX   | TOB  | GEN  | AMK | TGC | MIN | DOX | ERC | OMC | CST | CAM |
|----------------------|-----|-----|-------|-----|-----|-----|-----|-----|------|-------|-------|-------|-------|-------|------|------|-----|-----|-----|-----|-----|-----|-----|-----|
| 113250               | 4   | 4   | ≤0.12 | 1   | 1   | 1   | 0.5 | 2   | 0.25 | ≤0.03 | ≤0.03 | ≤0.06 | 0.125 | ≤0.06 | ≤0.5 | ≤0.5 | ≤1  | ND  | 2   | 2   | 1   | 2   | >16 | 4   |

PTZ: piperacillin-tazobactam, A/C: amoxicillin-clavulanic acid, AZT: aztreonam, FOX: ceftiofur, CFZ: cefazolin, CTR: ceftriaxone, CPM: cefepime, CTX: cefotaxime, CAZ: ceftazidime, C/T: ceftolozane-tazobactam, IMI: imipenem, MER: meropenem, DOR: doripenem, ETP: ertapenem, CIP: ciprofloxacin, LEV: levofloxacin, MOX: moxifloxacin, TOB: tobramycin, GEN: gentamicin, AMK: amikacin, TGC: tigecycline, MIN: minocycline, DOX: doxycycline, ERC: eravacycline, OMC: omadacycline, CST: colistin, CAM: chloramphenicol, ND: not determined.
